# Supplementary material for: C-4 benzofuranylation of pyrazolones by a metal-free catalyzed indirect heteroarylation strategy
Source: Royal Society of Chemistry journal article supplement (doi:10.1039/d1ob01920a), 2021-01-01

## C-4 benzofuranylation of pyrazolones by a metal-free catalyzed indirect heteroarylation strategy

Wande Zhang, Shah Nawaz, Yue Huang, Wenjing Gong, Xingfu Wei, Jingping Qu and Baomin Wang\*

State Key Laboratory of Fine Chemicals, Department of Pharmaceutical Sciences, School of Chemical Engineering, Dalian University of Technology, Dalian 116024, People's Republic of China. E-mail: bmwang@dlut.edu.cn

### Contents

|                                                         |    |
|---------------------------------------------------------|----|
| General information .....                               | S1 |
| Experimental procedures towards products <b>3</b> ..... | S1 |
| References.....                                         | S1 |
| NMR spectra for compounds <b>3aa-3pa</b> .....          | S2 |

## General information

Unless otherwise noted, materials were purchased from commercial suppliers and used without further purification. All reactions were carried out in Schlenk tube under a nitrogen atmosphere. All solvents were purified and dried according to standard methods prior to use. Reactions were monitored by thin layer chromatography (TLC) using silica gel plates. Flash chromatography was carried out utilizing silica gel 200-300 mesh. <sup>1</sup>H NMR, <sup>19</sup>F NMR spectra were recorded on a Vaian DL G400 400 MHz and Vaian DL G400 377 MHz respectively, <sup>13</sup>C NMR spectra were recorded on a Vaian DL G400 101 MHz. The solvent used for NMR spectroscopy was CDCl<sub>3</sub>, using tetramethylsilane as the internal reference. Data for <sup>1</sup>H NMR are recorded as follows: chemical shift ( $\delta$ , ppm), multiplicity (s = singlet, d = doublet, t = triplet, m = multiplet or unresolved, br = broad singlet, dd = double doublet, dt = double triplet, td = triple doublet, coupling constants in Hz, integration). Data for <sup>13</sup>C NMR and <sup>19</sup>F NMR are reported in terms of chemical shift ( $\delta$ , ppm). HRMS (ESI) was determined by an HRMS/MS instrument (LTQ Orbitrap XL™). The crystal structure of **3aa** was determined by the X-ray analysis.

Pyrazolones and 2-(3-hydroxy-3,3-diarylprop-1-yn-1-yl)phenols were prepared according to the literature procedures.<sup>1,2</sup>

## Experimental procedures towards products 3

To a stirred solution of pyrazolone **1** (0.36 mmol, 1.2 eq) in toluene (3.0 mL) was added TsOH (0.03 mmol, 0.1 eq) under N<sub>2</sub> at room temperature, and 2-(3-hydroxy-3,3-diarylprop-1-yn-1-yl)phenol **2** was added in batches within 10 minutes after 5 minutes. After the completion of the reaction determined by TLC, the crude product was purified by flash column chromatography (petroleum ether/ethyl acetate = 30/1 to 15/1) on neutral alumina to give the product **3**.

## References

1. (a) M. Kamlar, I. Císařová and J. Veselý, Alkynylation of heterocyclic compounds using hypervalent iodine reagent, *Org. Biomol. Chem.*, 2015, **13**, 2884-2889; (b) X. Sheng, J. Zhang, H. Yang and G. Jiang, Tunable aerobic oxidative hydroxylation/dehydrogenative homocoupling of pyrazol-5-ones under transition-metal-free conditions, *Org. Lett.*, 2017, **19**, 2618-2621.
2. Y. F. Qiu, Y. Y. Ye, X. R. Song, X. Y. Zhu, F. Yang, B. Song, J. Wang, H. L. Hua, Y. T. He, Y. P. Han, X. Y. Liu and Y. M. Liang, Convenient and highly efficient routes to 2H-chromene and 4-chromanone derivatives: Iodine-promoted and *p*-toluenesulfonic acid catalyzed cascade cyclizations of propynols, *Chem. Eur. J.*, 2015, **21**, 3480-3487.

# NMR spectra for compounds 3aa-3pa

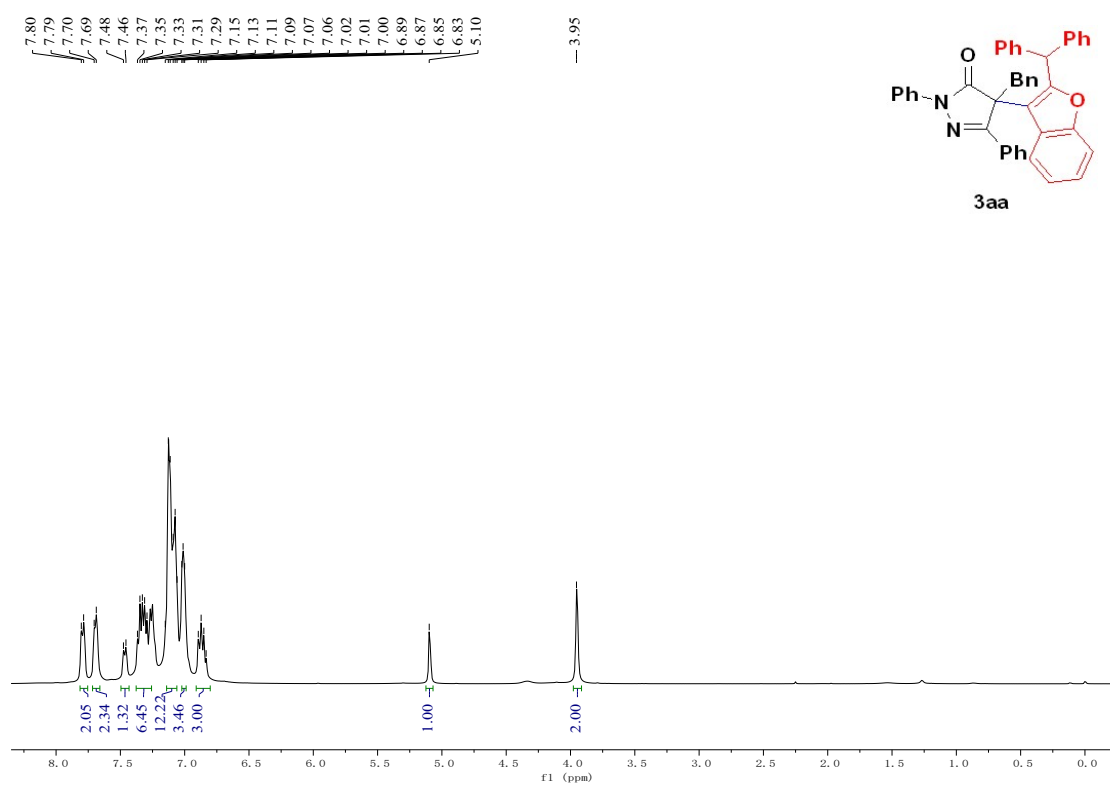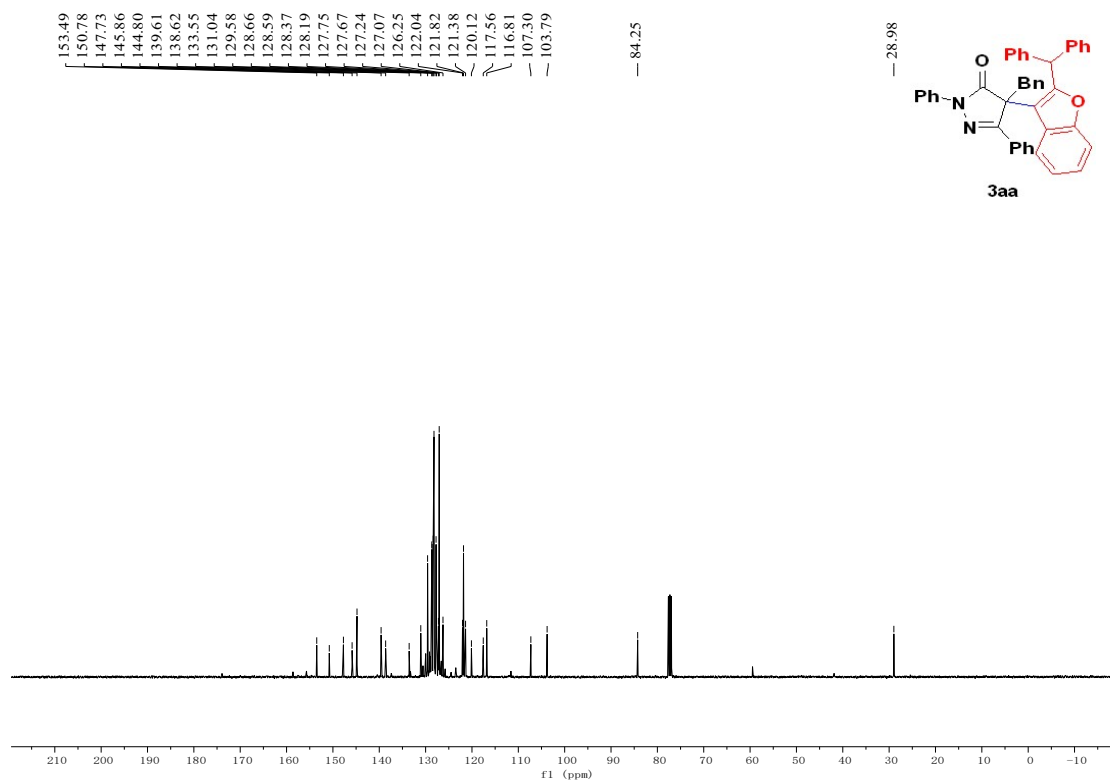

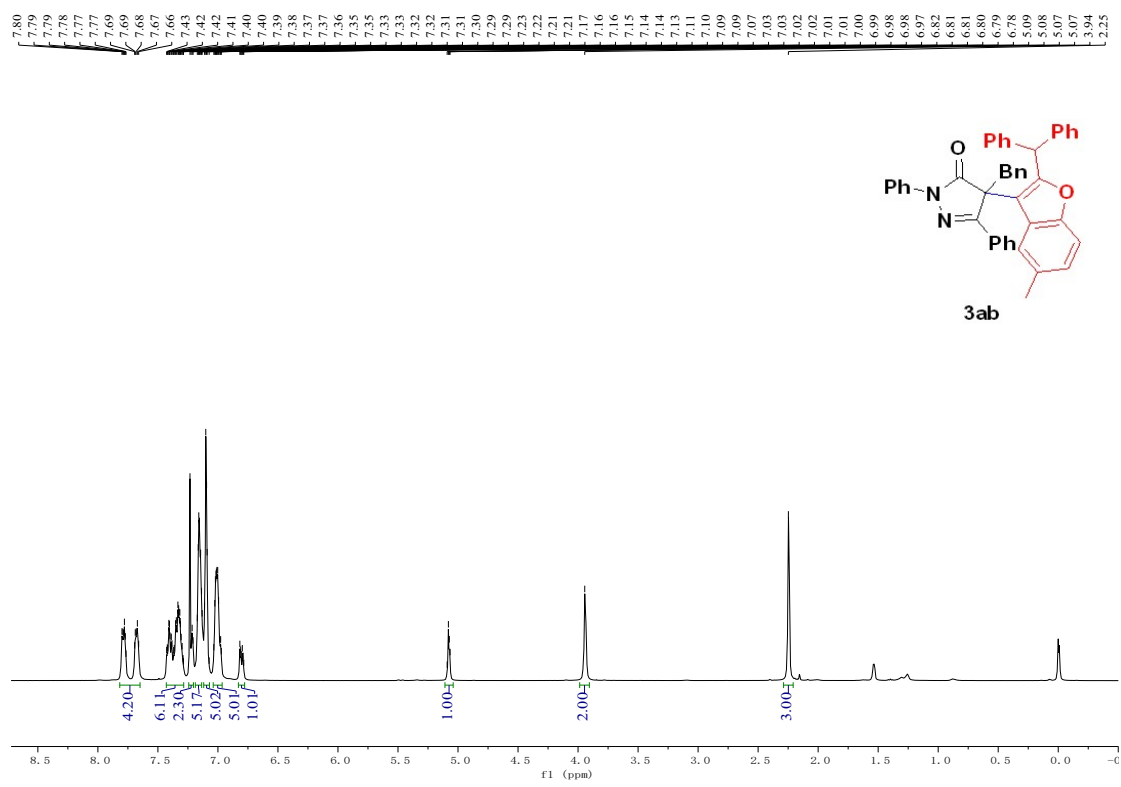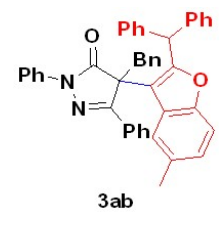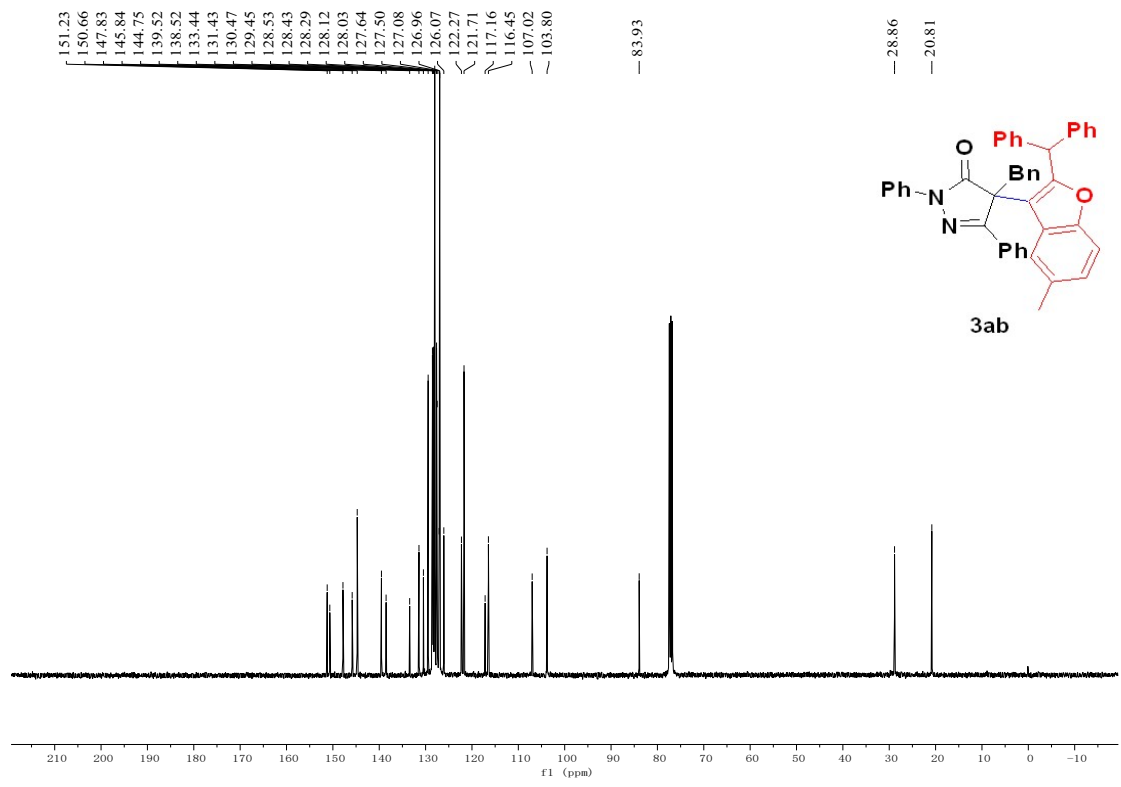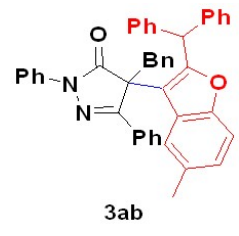

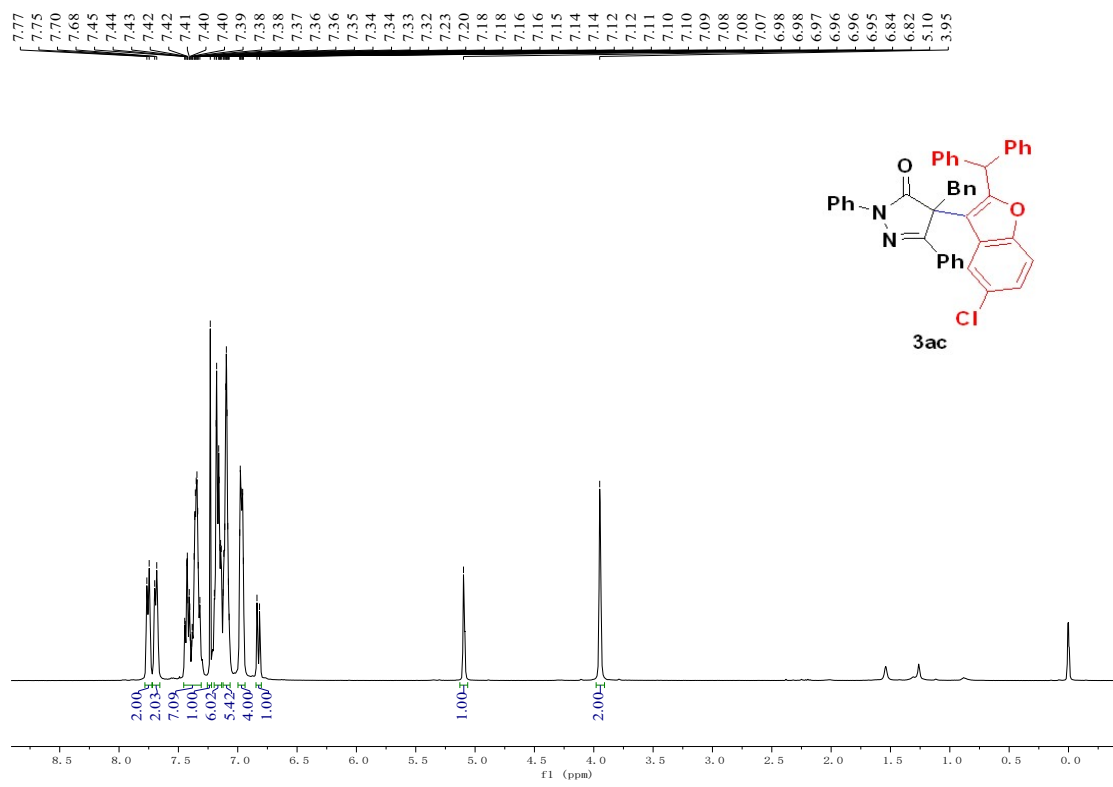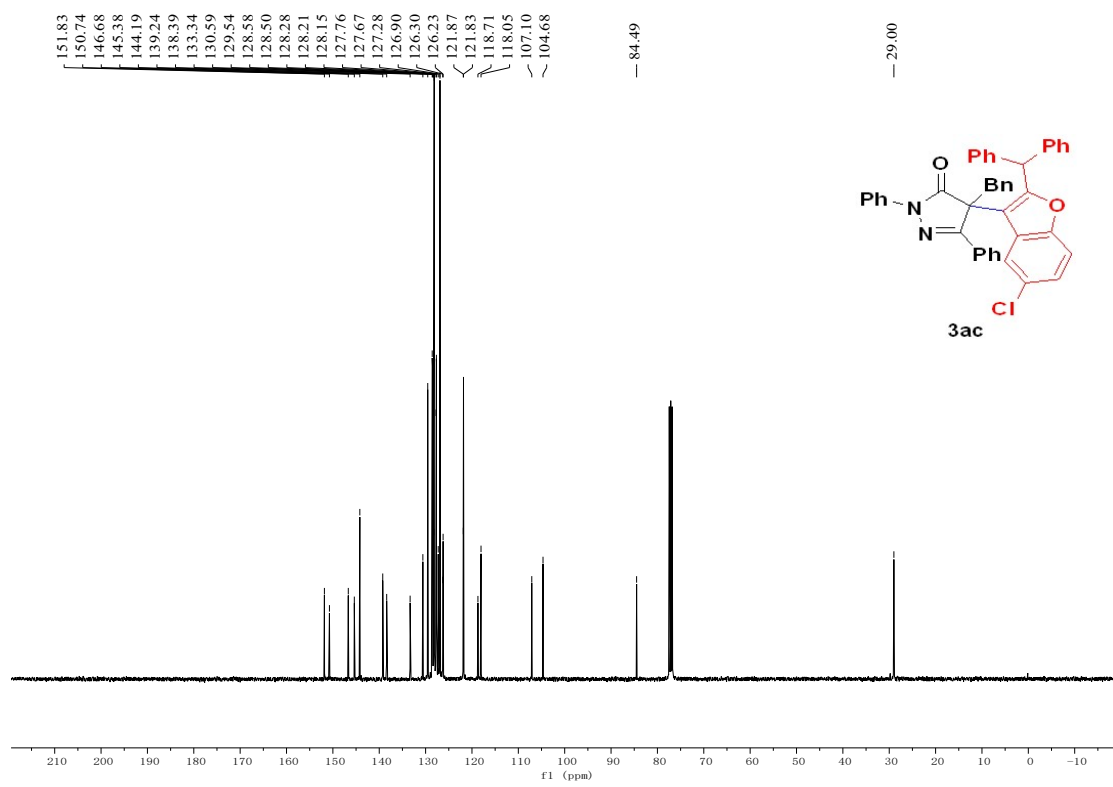

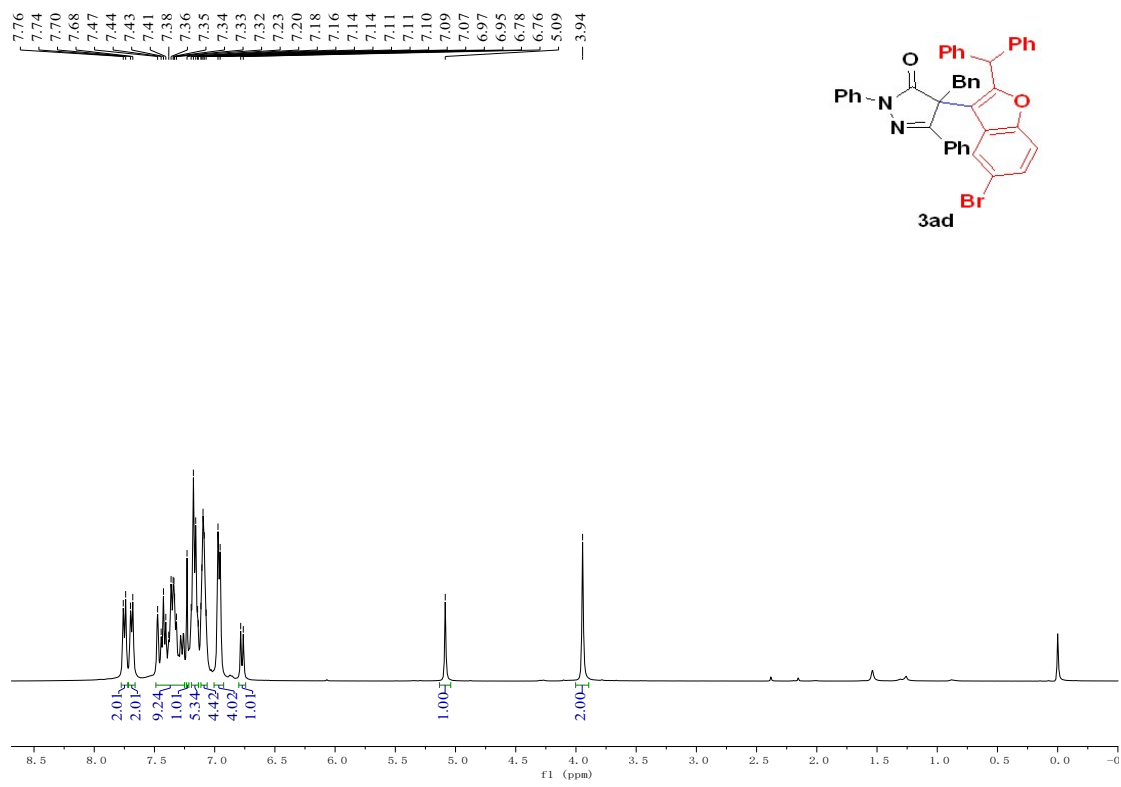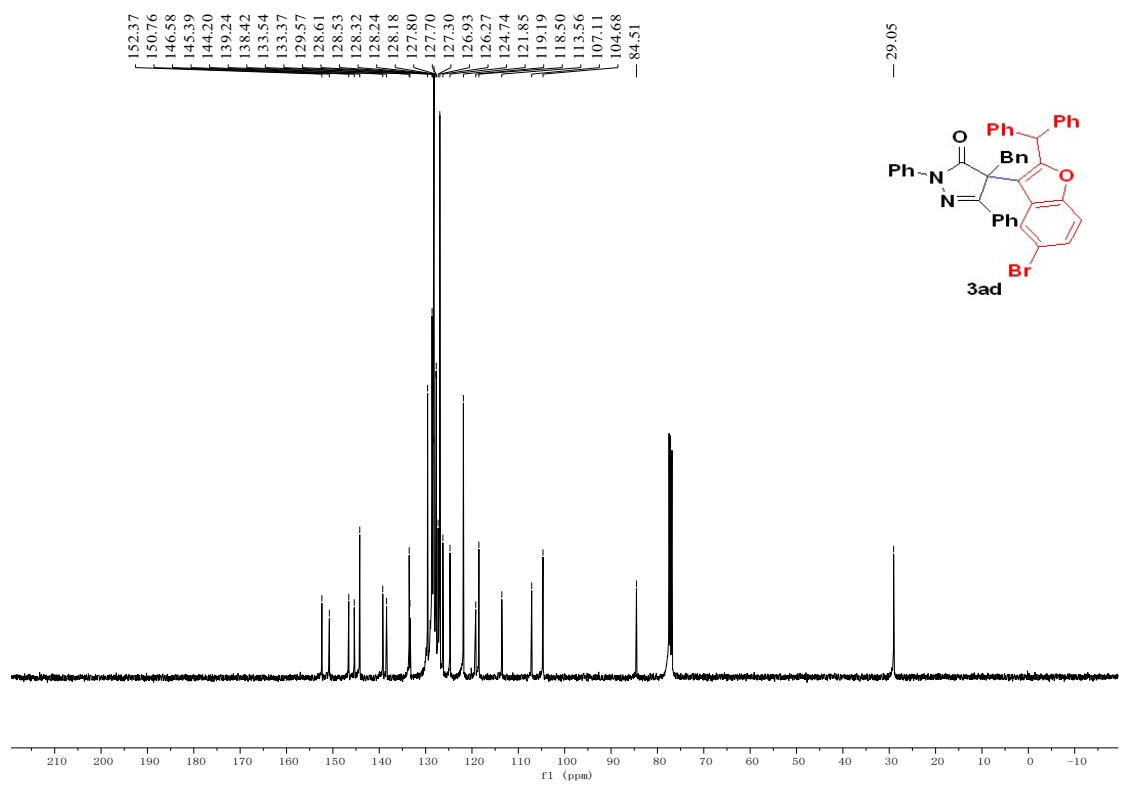

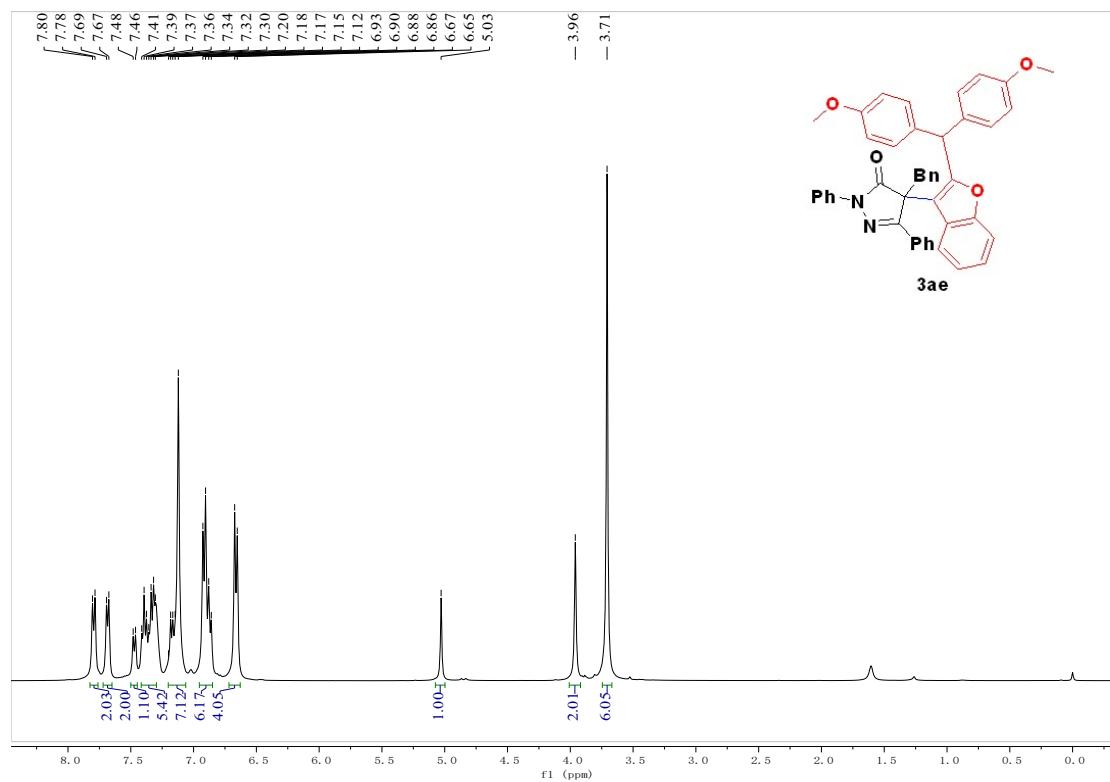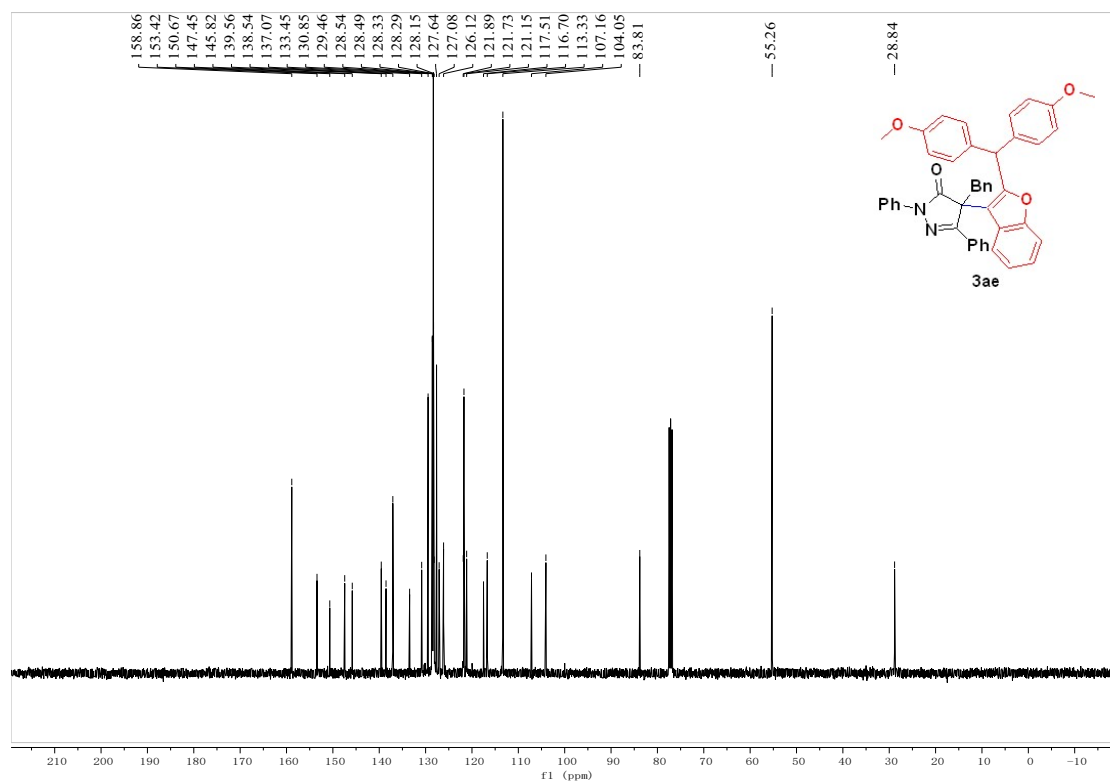

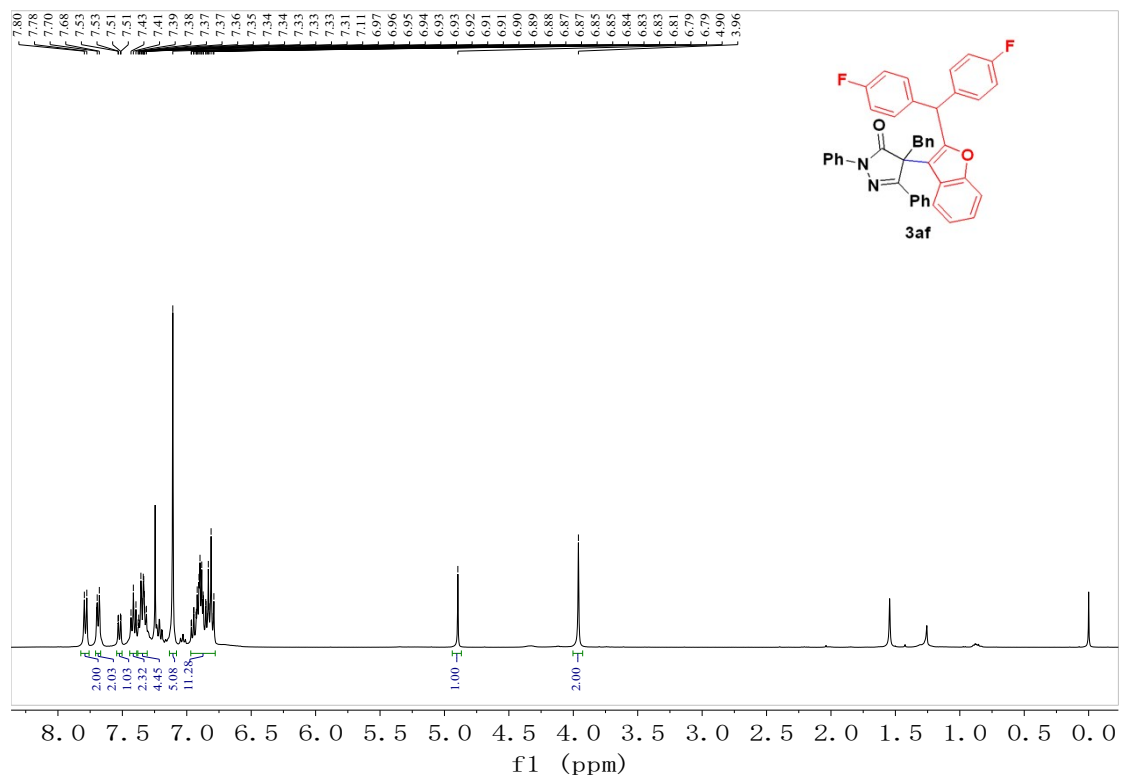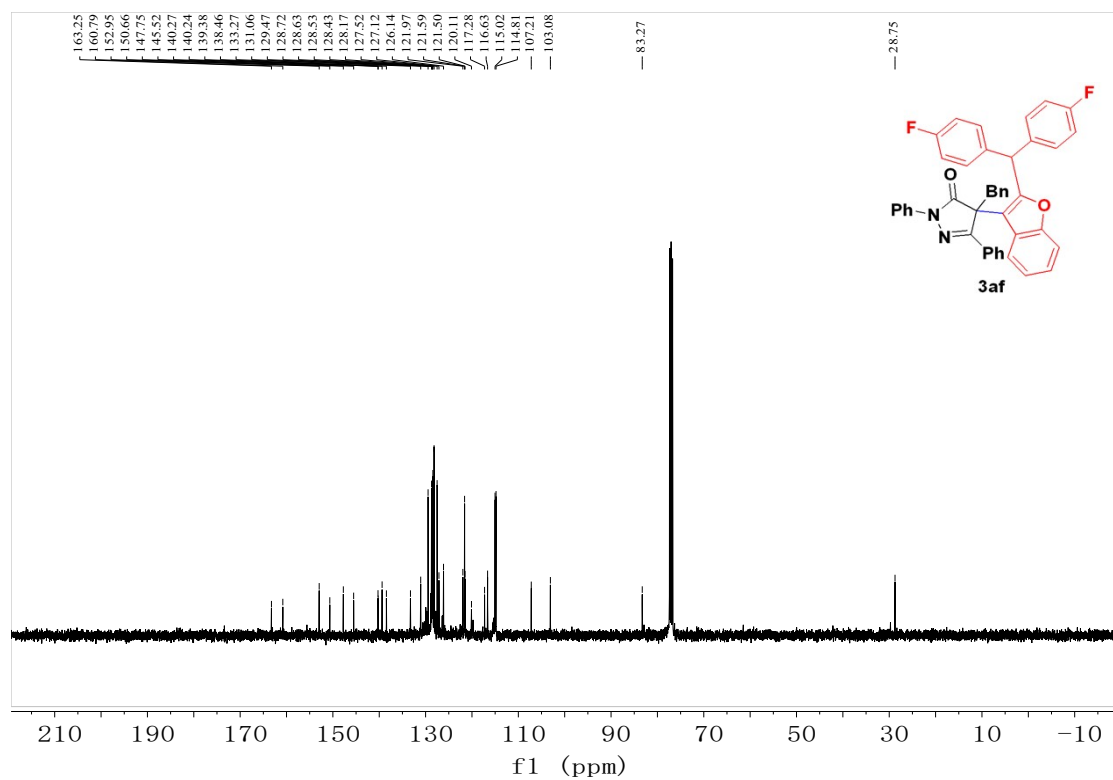



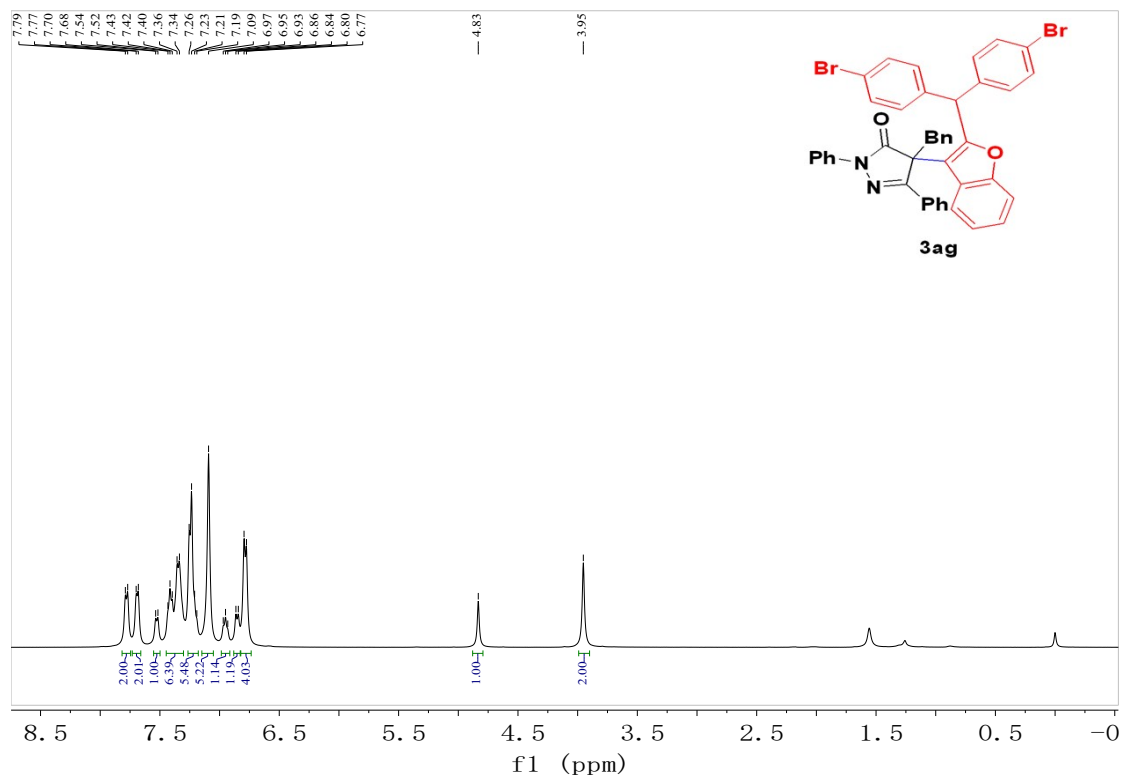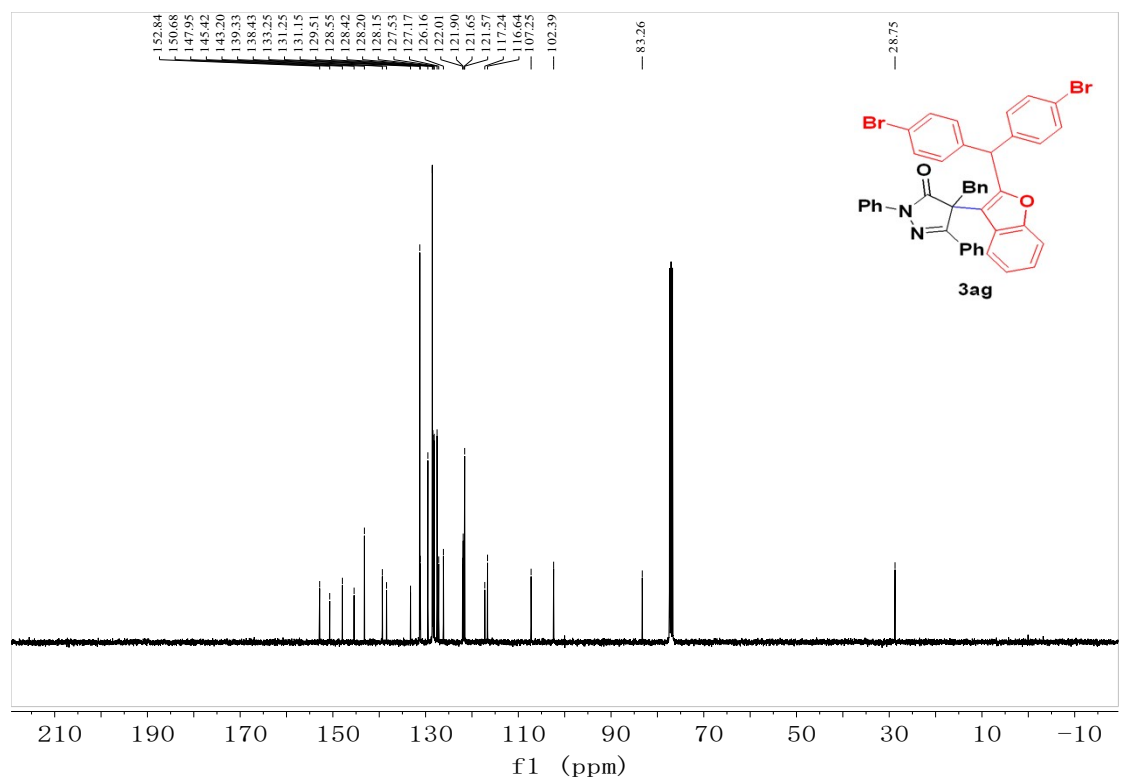

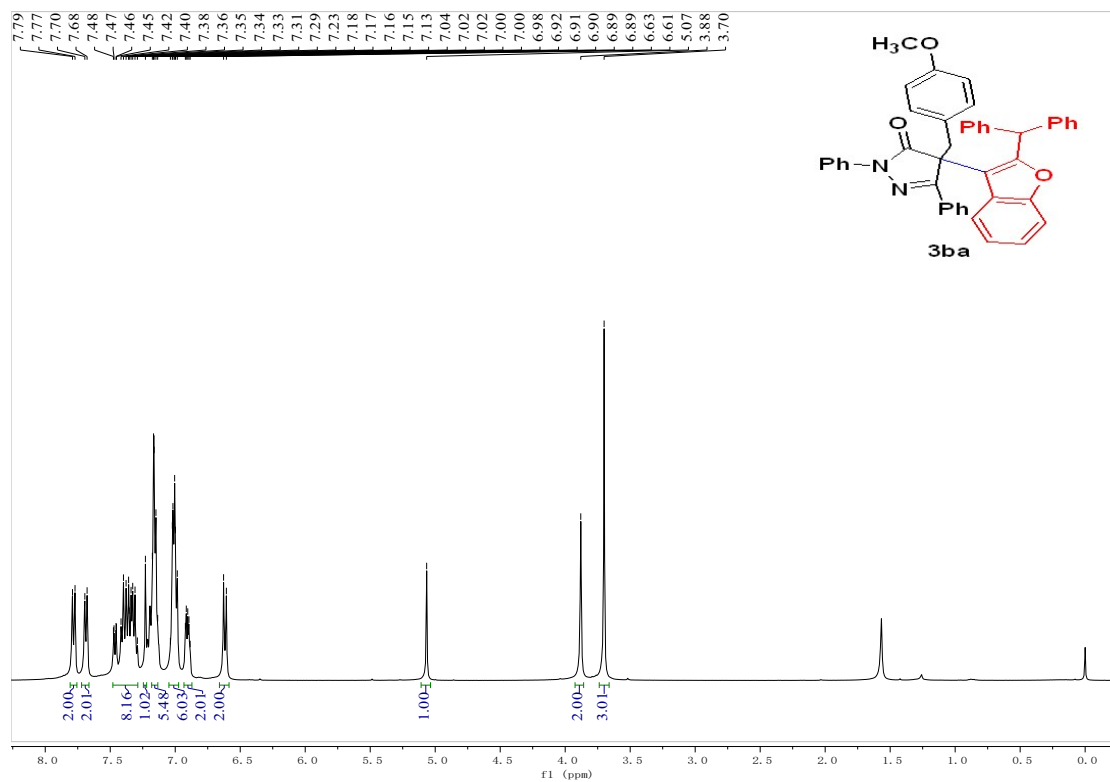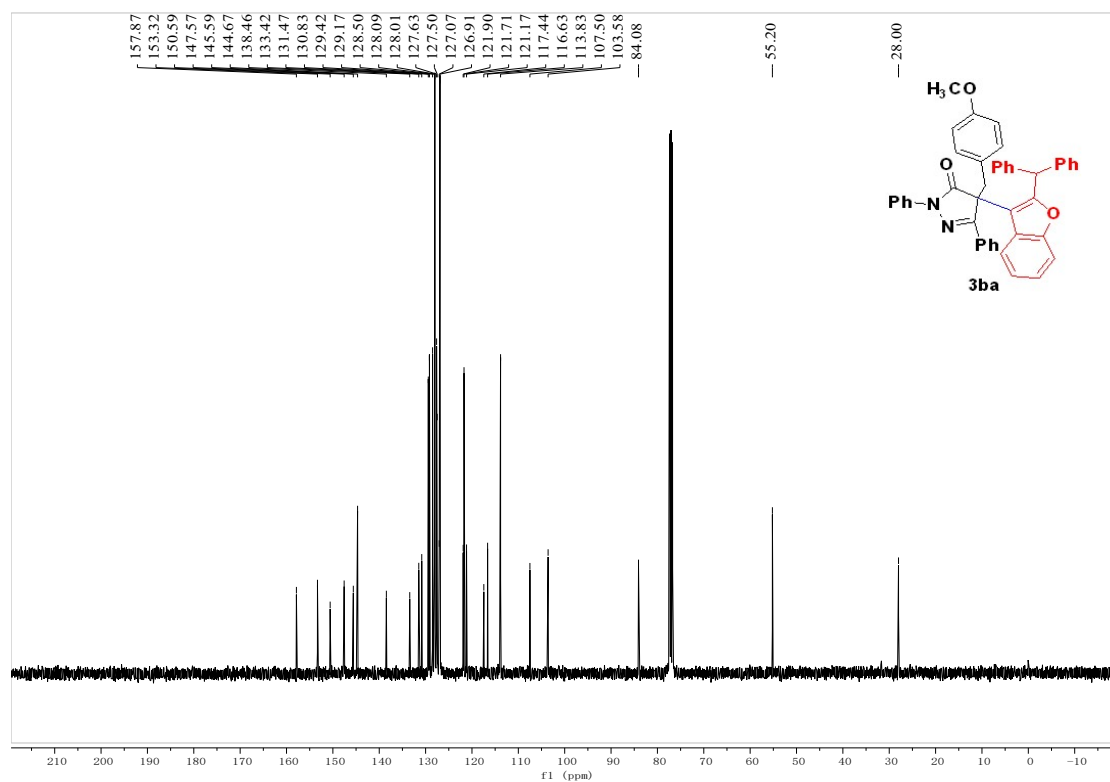

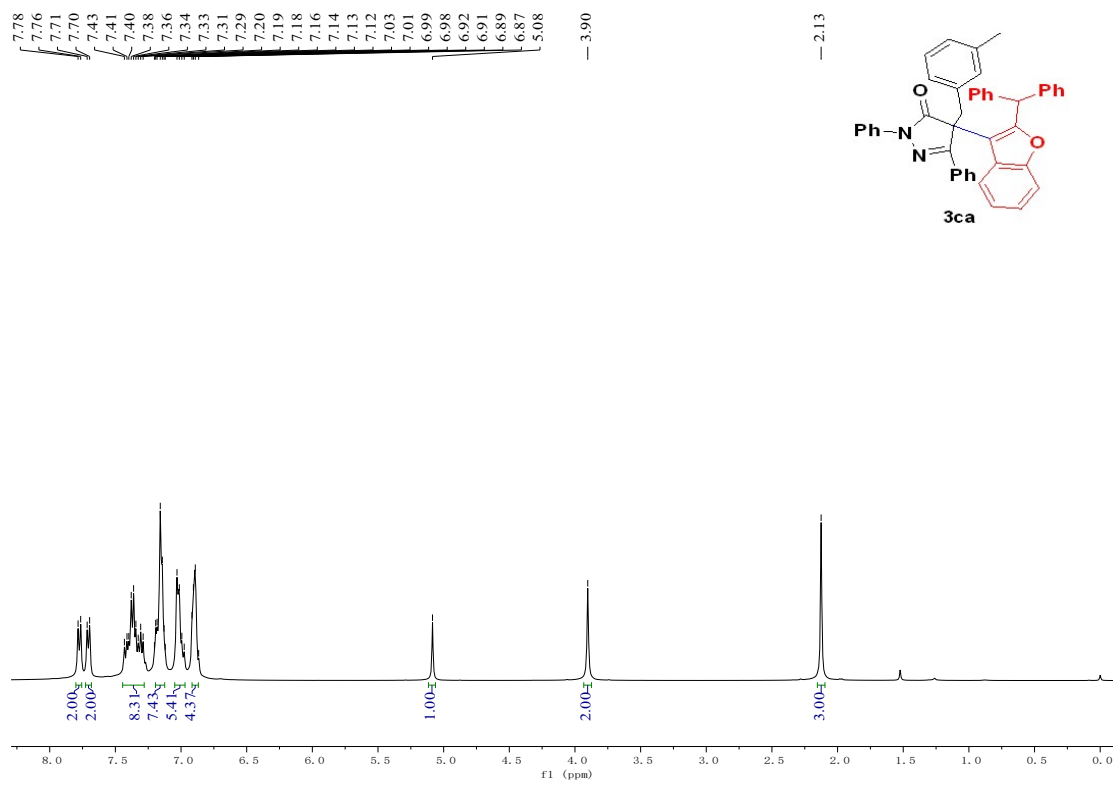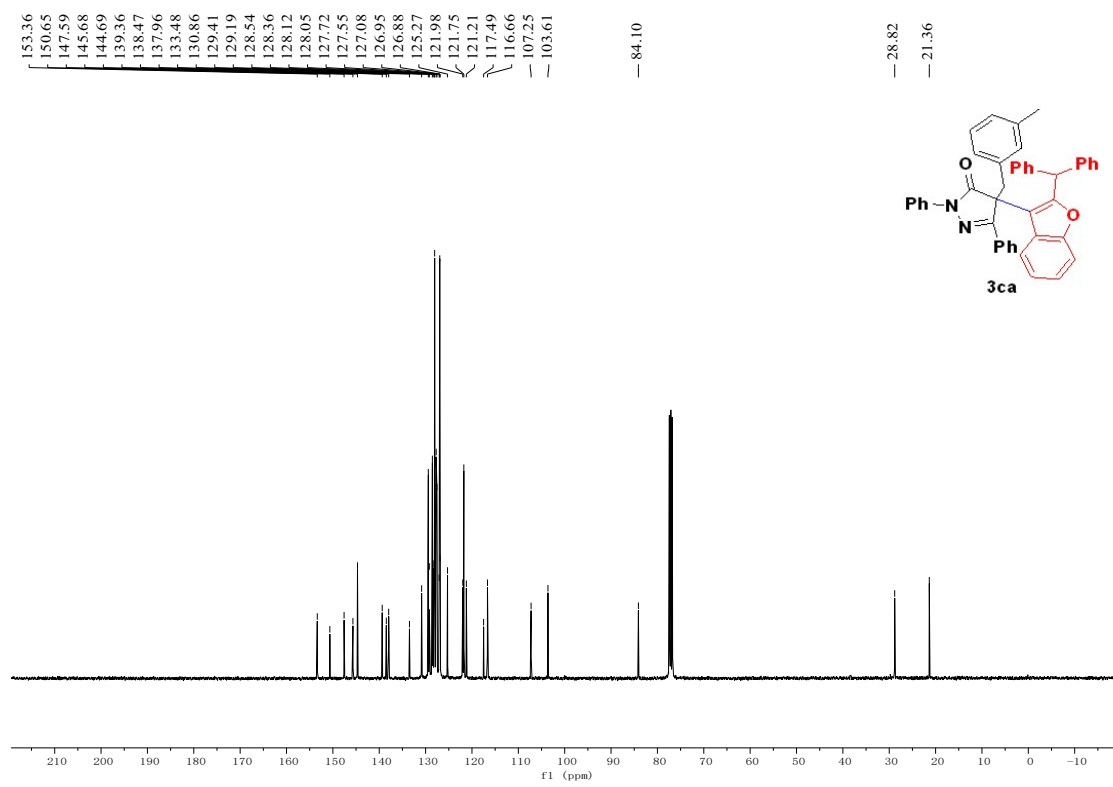

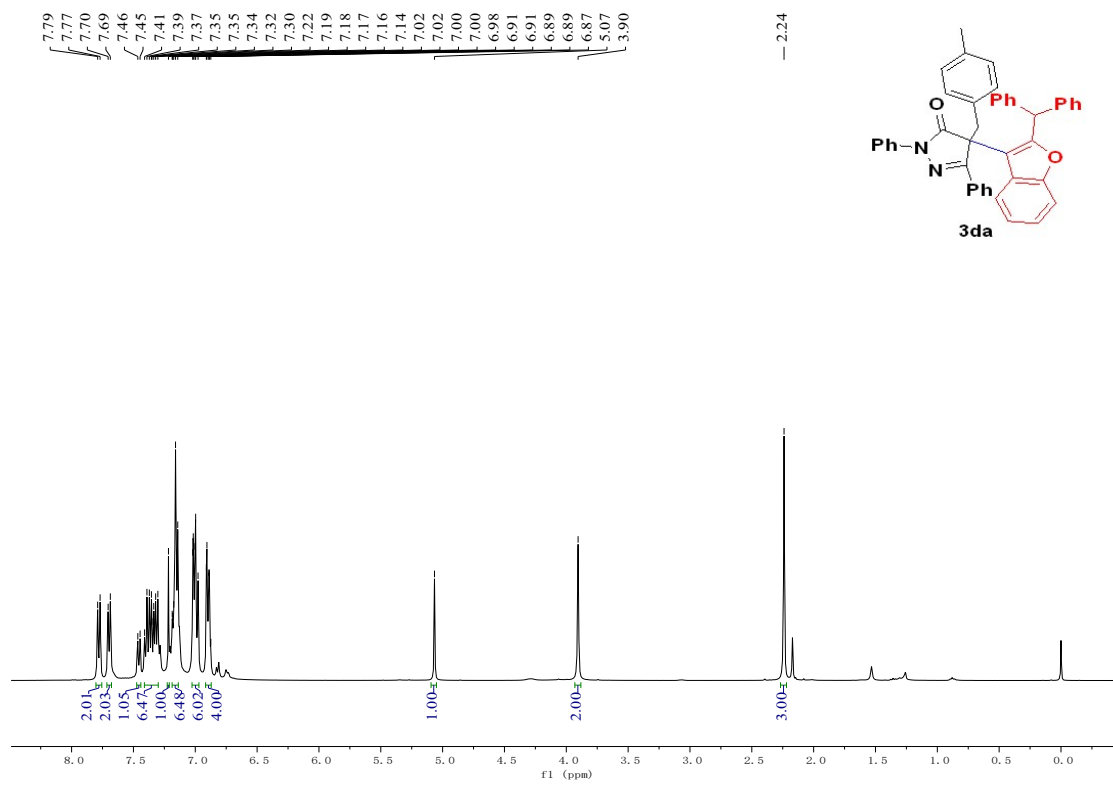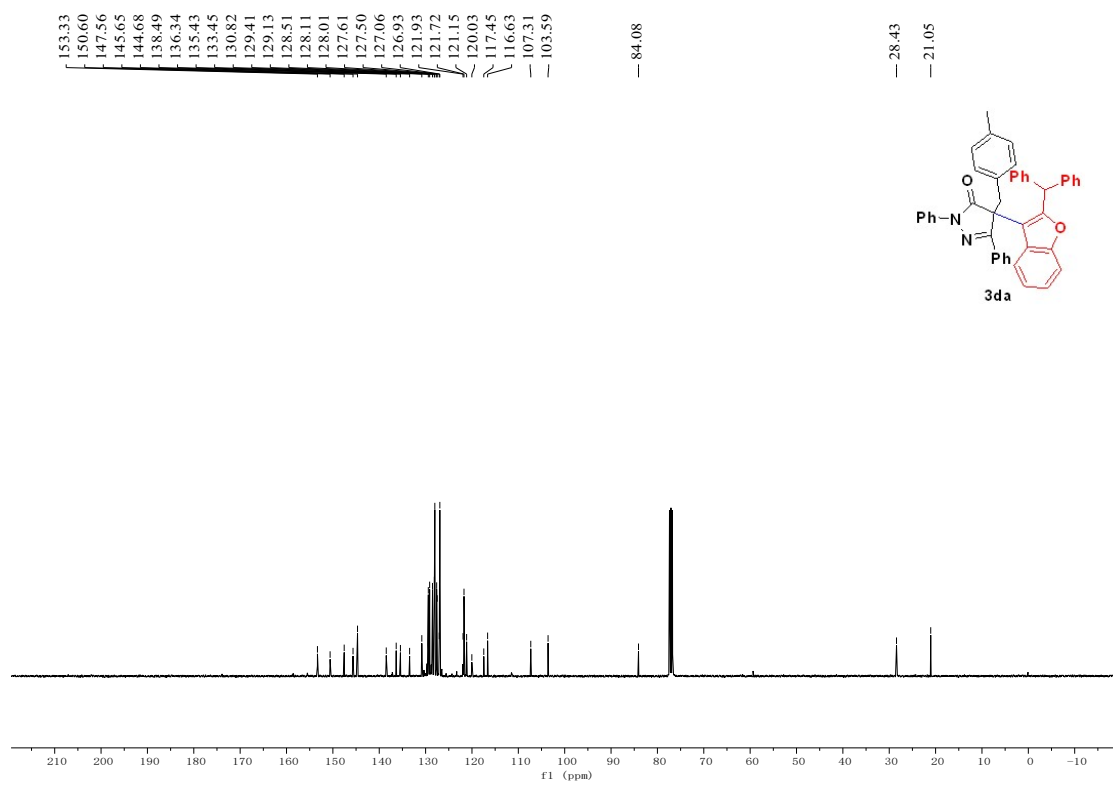

7.81  
7.79  
7.70  
7.68  
7.47  
7.47  
7.45  
7.45  
7.44  
7.42  
7.40  
7.40  
7.39  
7.38  
7.37  
7.37  
7.35  
7.34  
7.33  
7.32  
7.32  
7.23  
7.22  
7.21  
7.21  
7.20  
7.19  
7.19  
7.18  
7.17  
7.17  
7.16  
7.14  
7.02  
7.02  
7.01  
7.01  
6.99  
6.99  
6.93  
6.93  
6.92  
6.92  
6.91  
6.91  
6.90  
6.90  
6.89  
6.89  
6.88  
6.87  
6.77  
6.75  
6.73  
5.04  
3.99

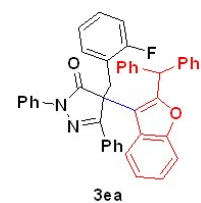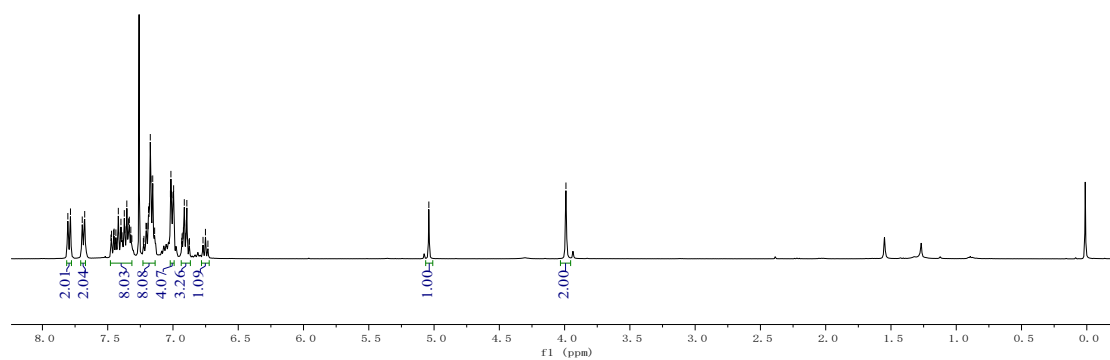

153.30  
150.61  
147.53  
144.61  
138.41  
133.26  
130.84  
129.98  
129.94  
129.44  
128.53  
128.14  
128.00  
127.82  
127.74  
127.49  
127.14  
126.89  
123.97  
123.94  
121.87  
121.71  
121.15  
117.36  
116.63  
115.11  
103.82  
103.43

84.01

21.92

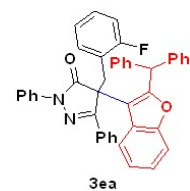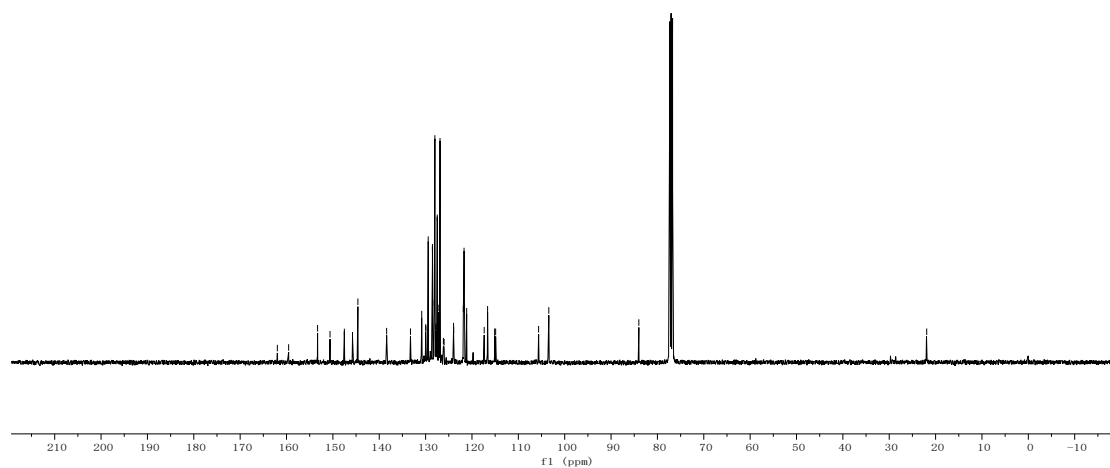

7.81  
7.79  
7.66  
7.64  
7.42  
7.40  
7.39  
7.37  
7.35  
7.33  
7.31  
7.29  
7.27  
7.17  
7.15  
7.13  
7.12  
7.03  
7.02  
7.00  
7.00  
6.92  
6.90  
6.88  
6.86  
6.84  
6.84  
5.05  
4.06

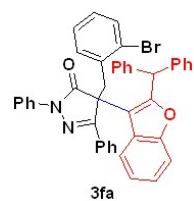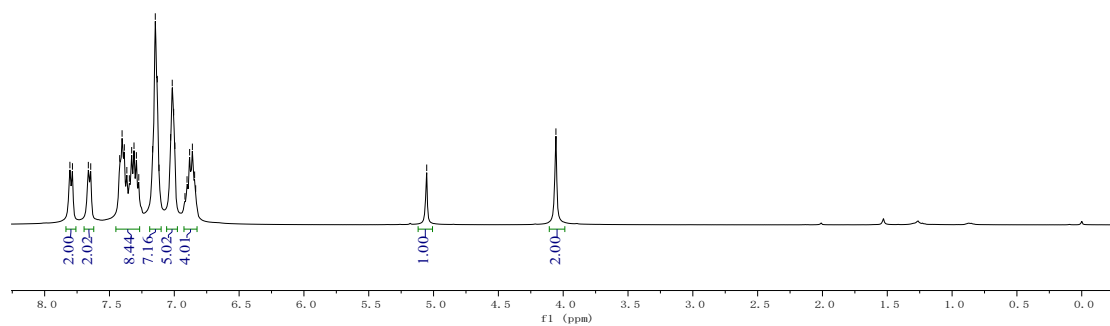

153.35  
150.70  
147.61  
145.89  
144.68  
138.47  
138.27  
133.27  
132.68  
130.91  
129.81  
129.52  
128.64  
128.22  
128.10  
127.87  
127.56  
127.44  
127.39  
127.24  
126.95  
124.62  
121.96  
121.78  
121.21  
117.40  
116.68  
105.78  
103.51  
84.05  
29.82

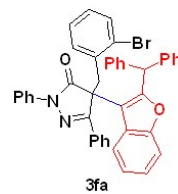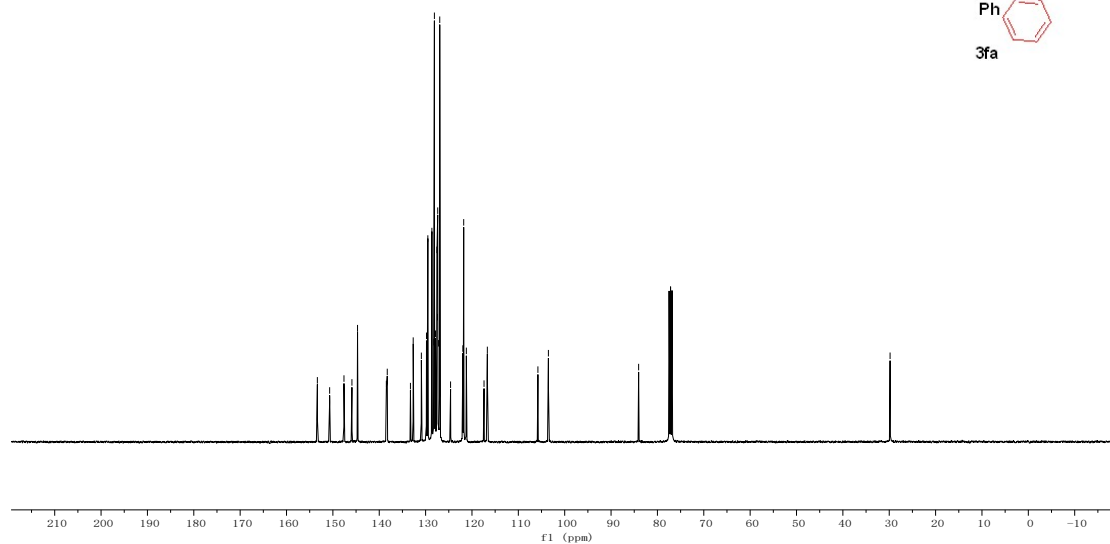

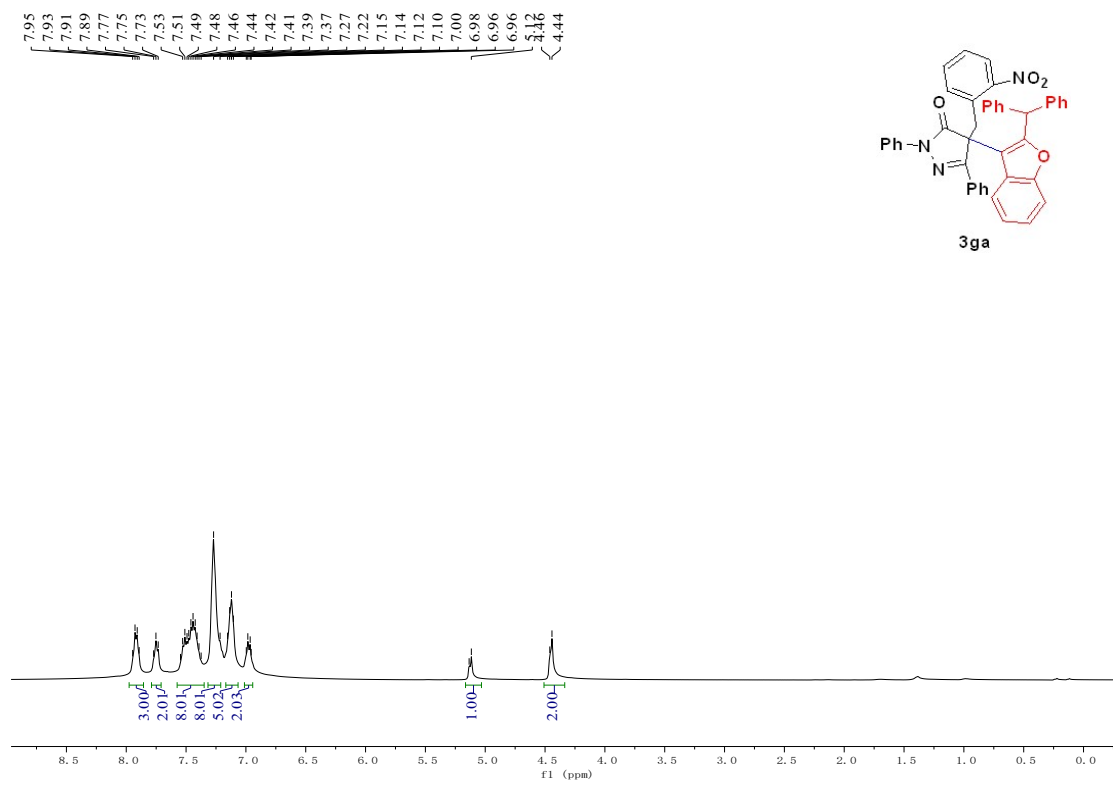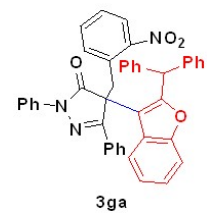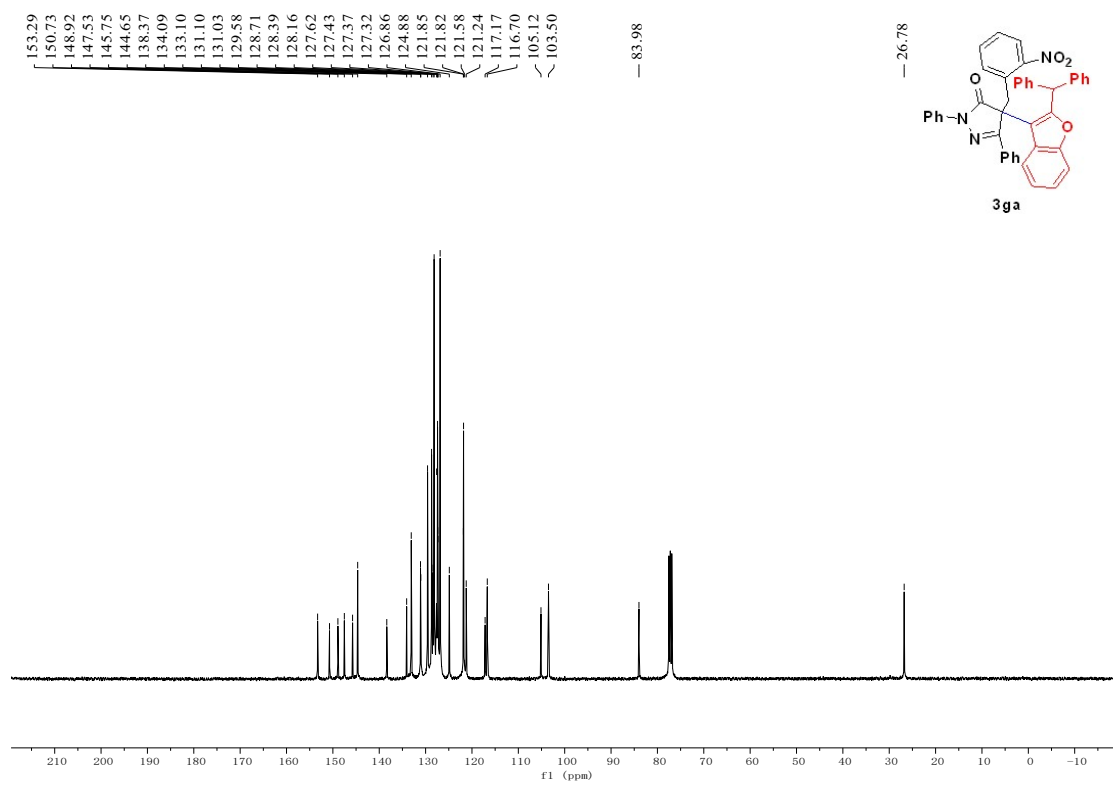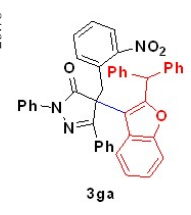

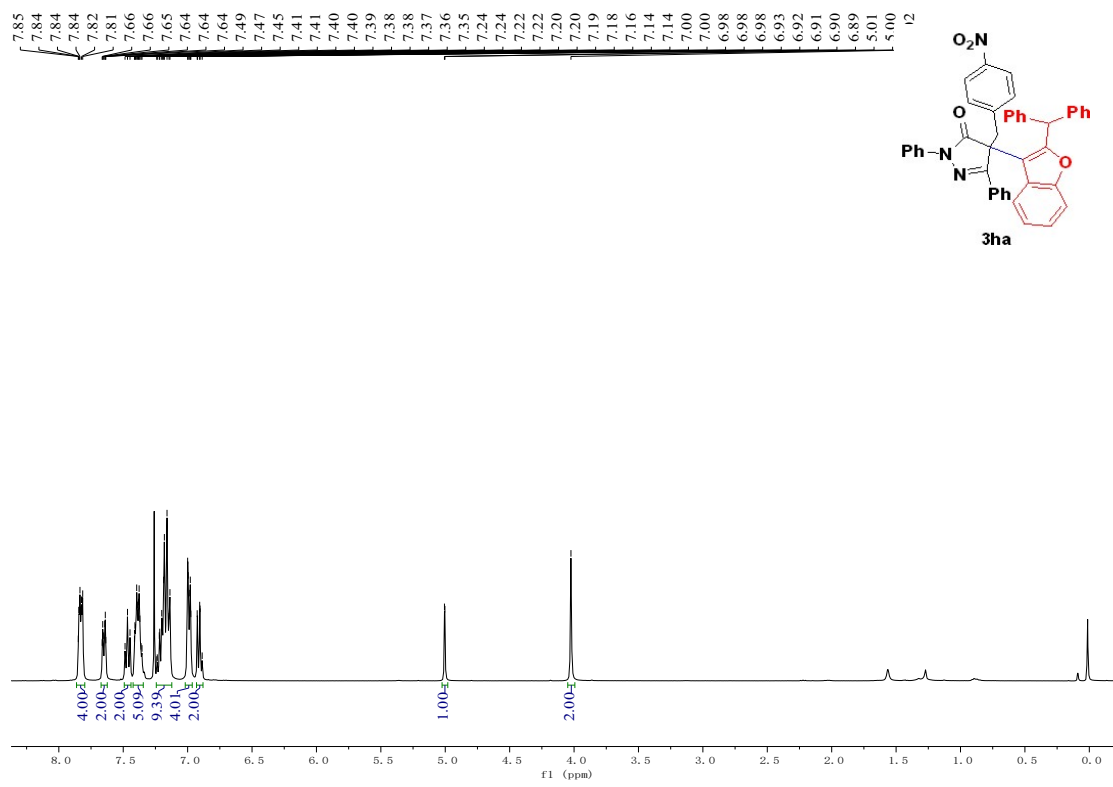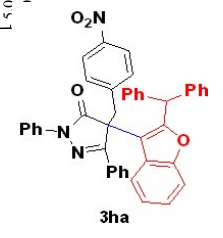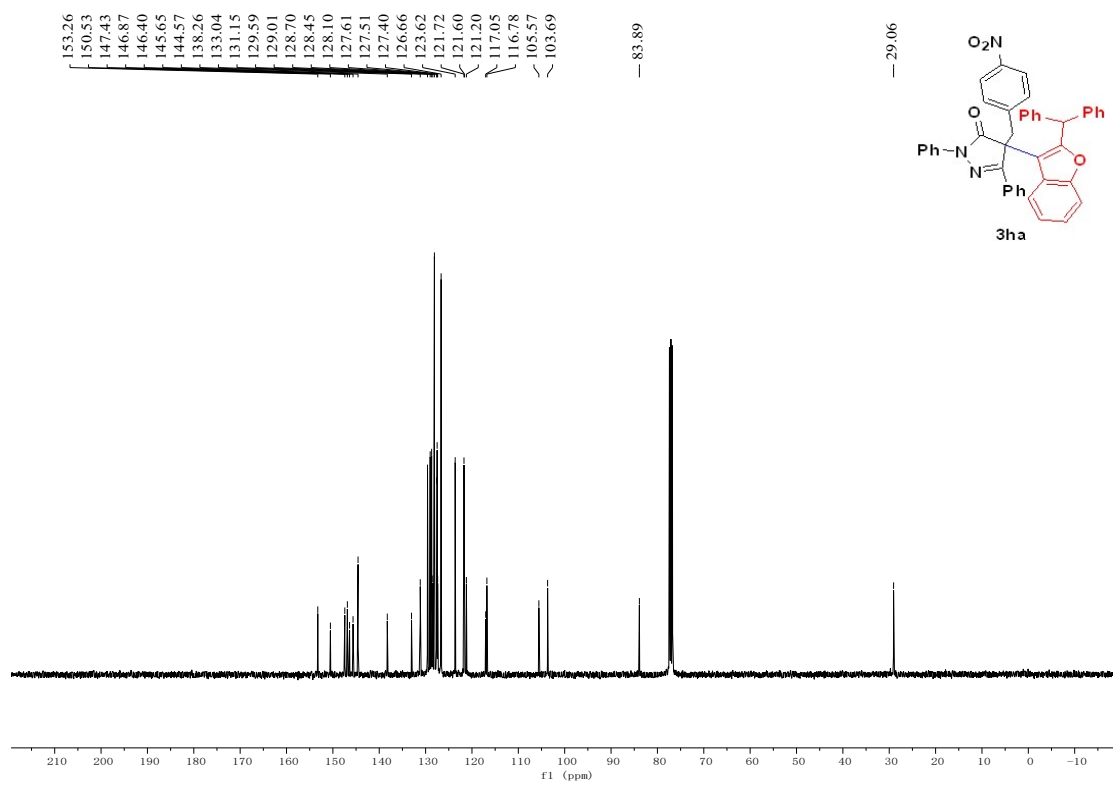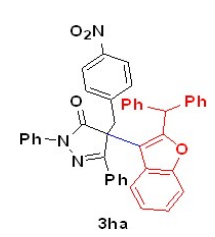



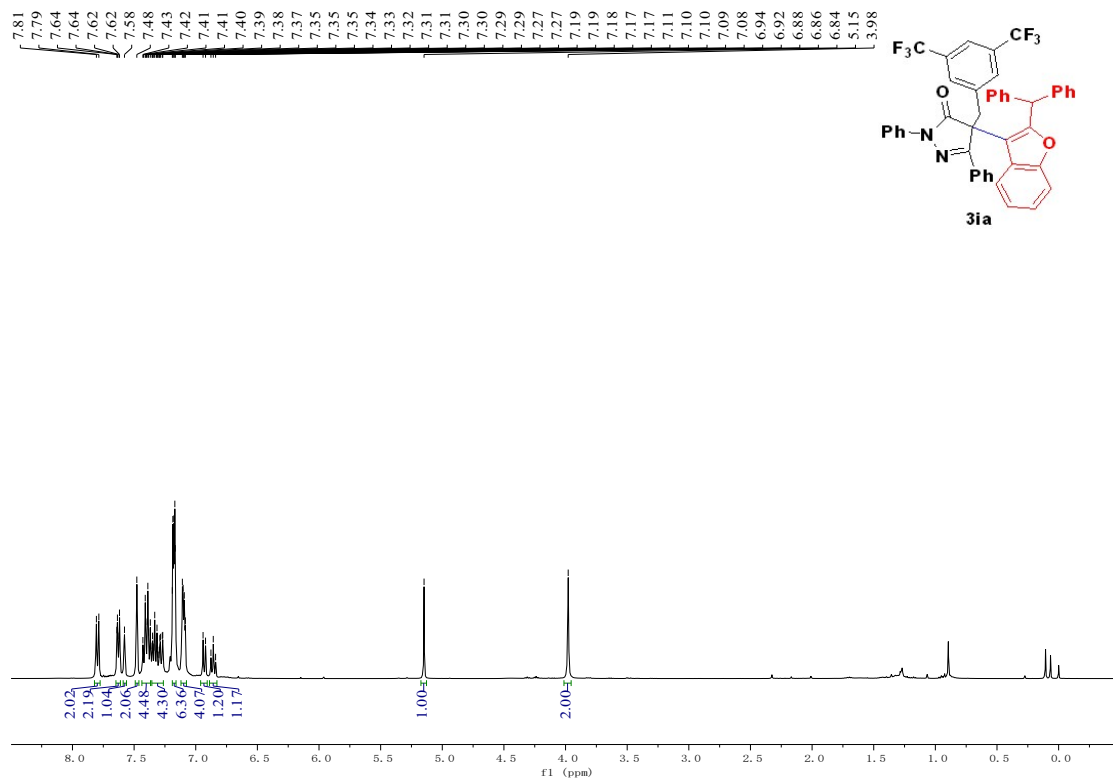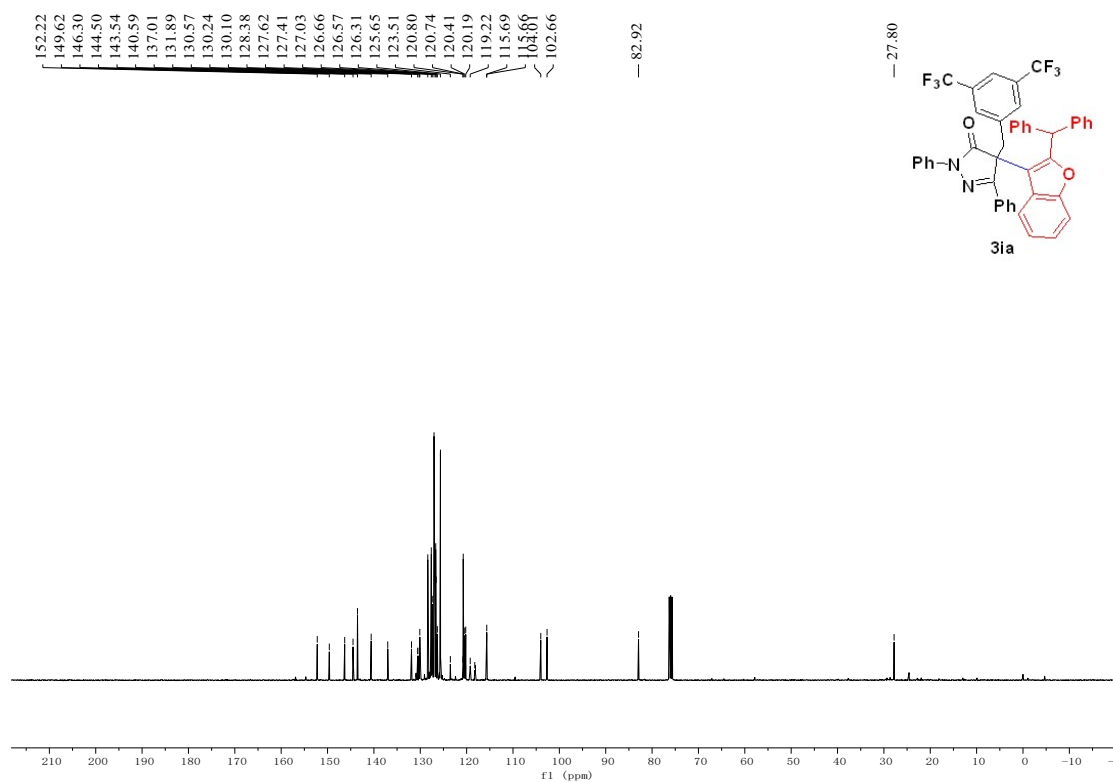

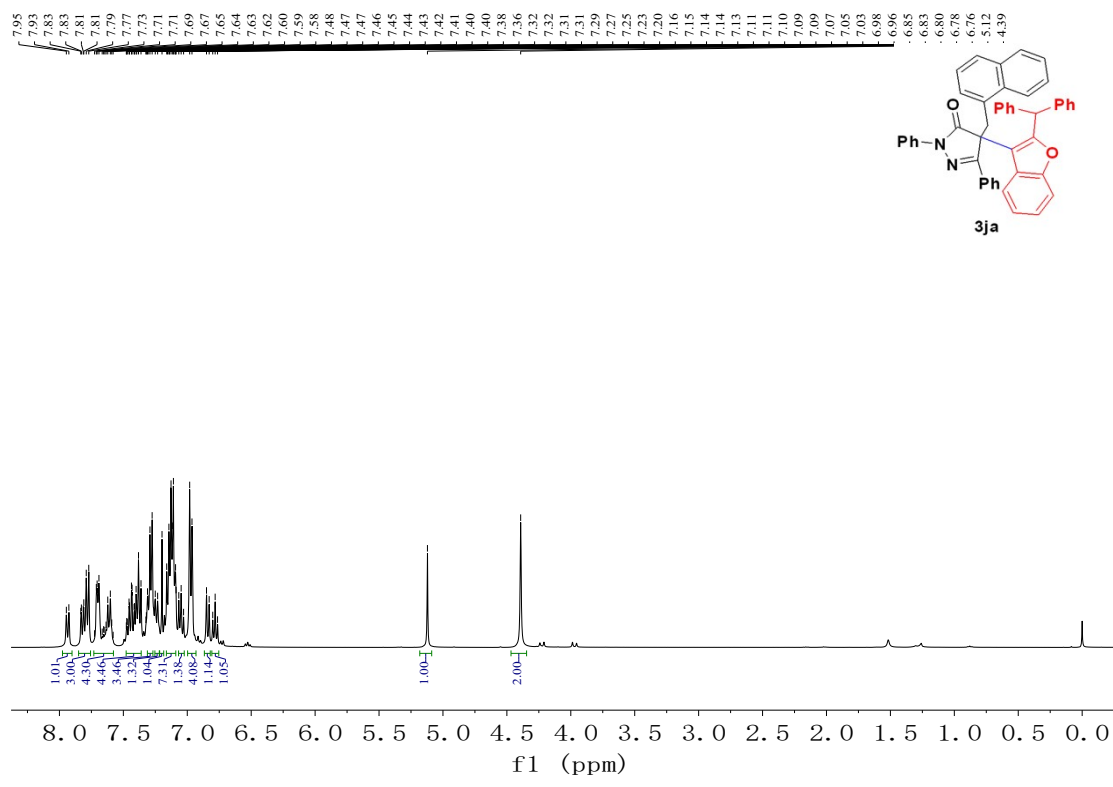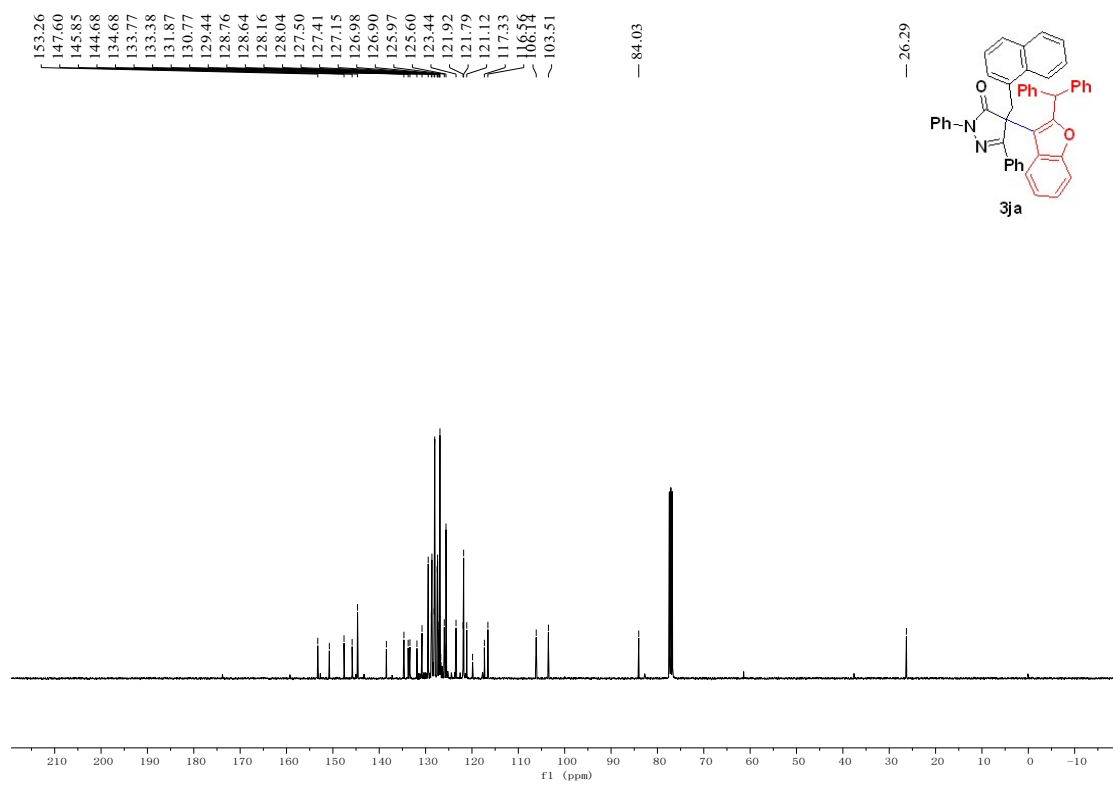

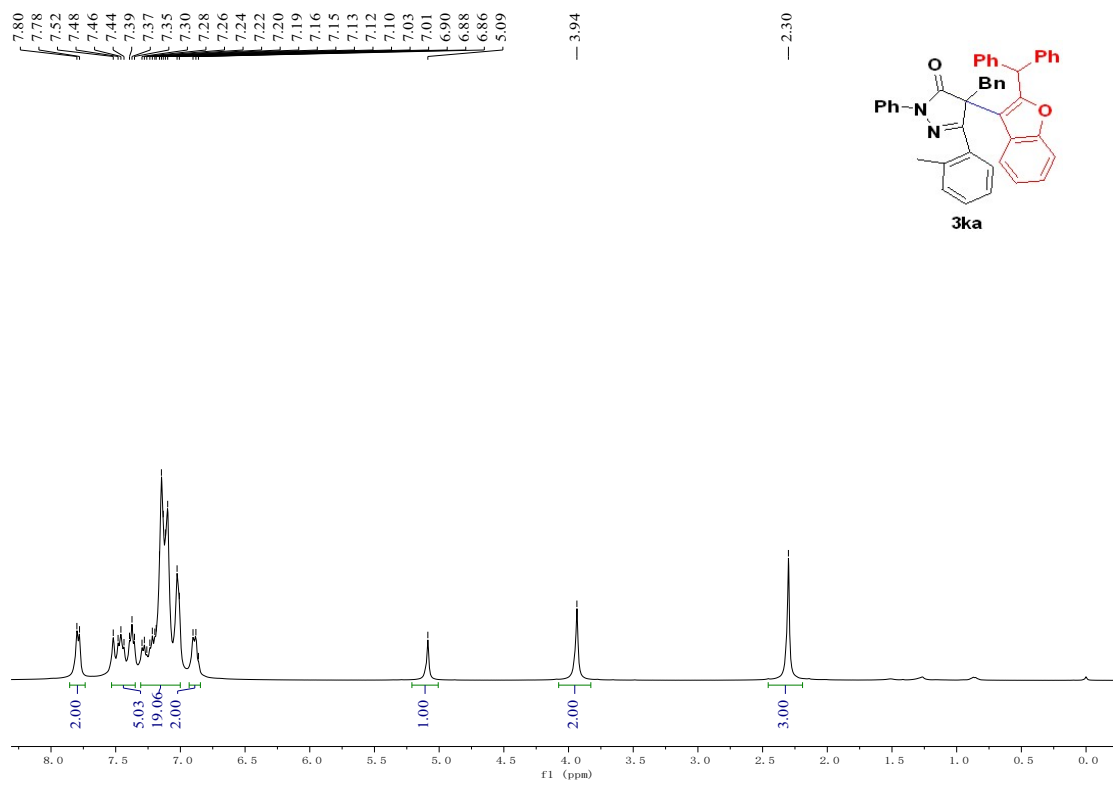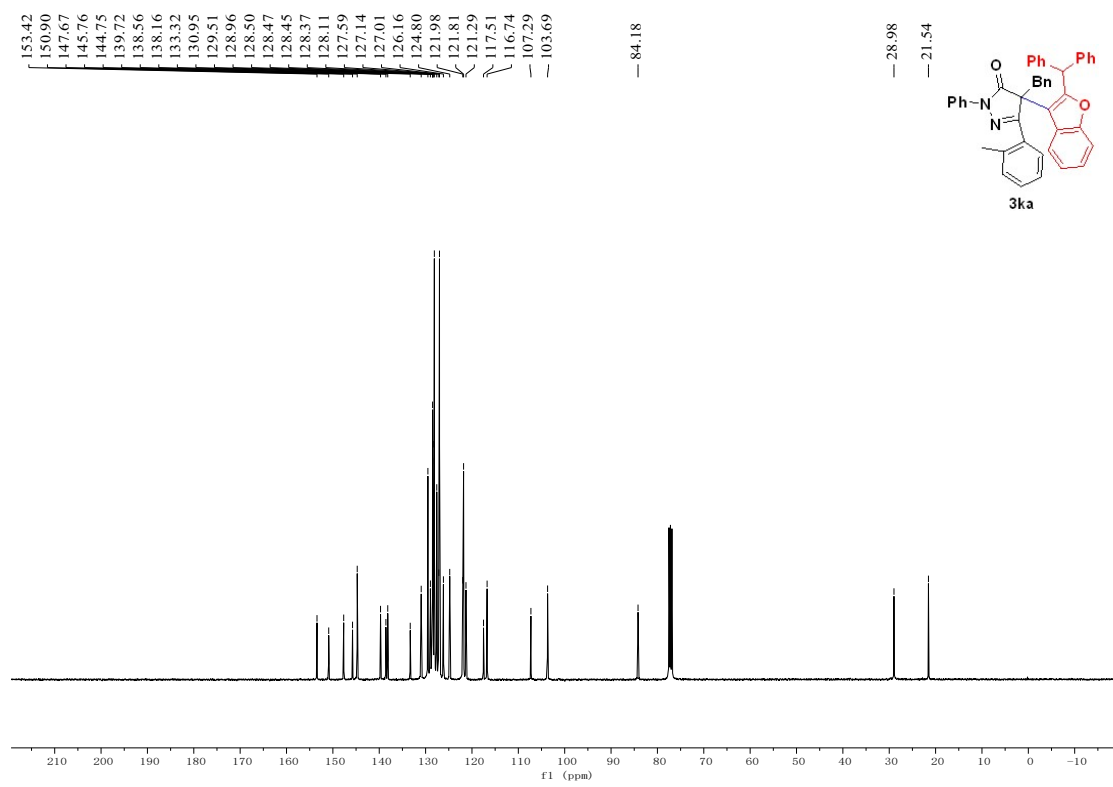

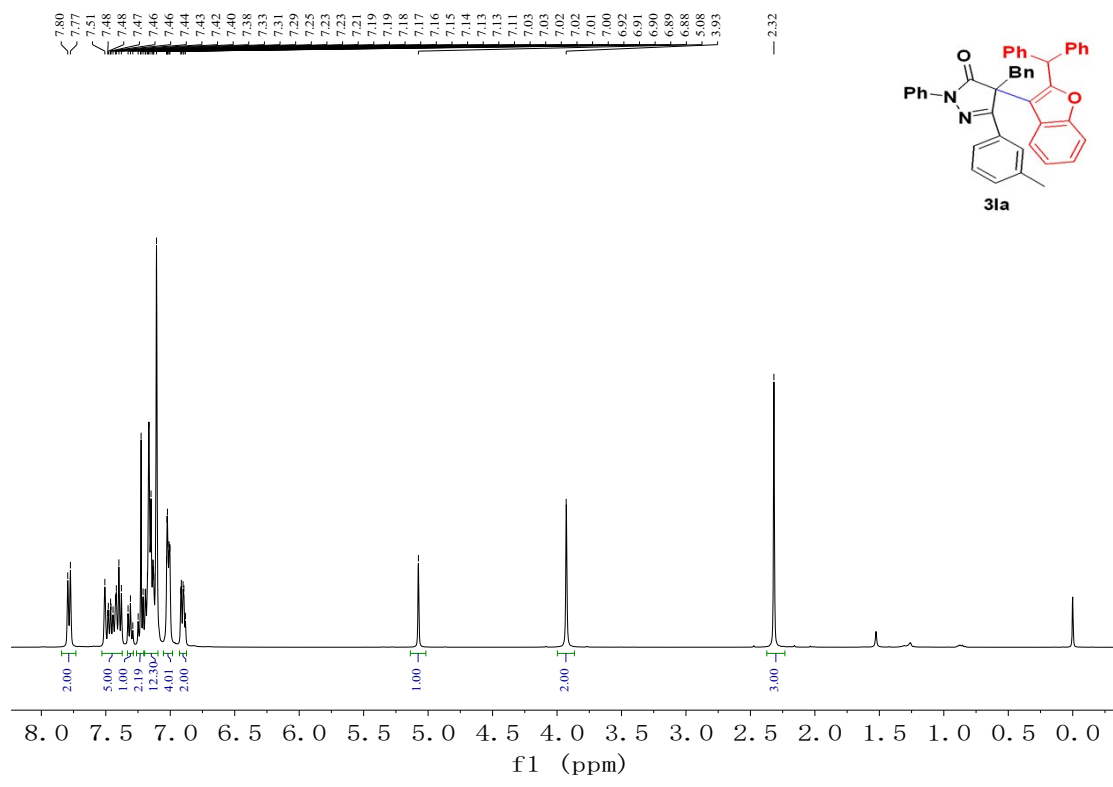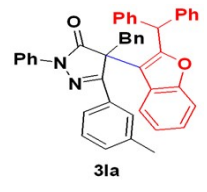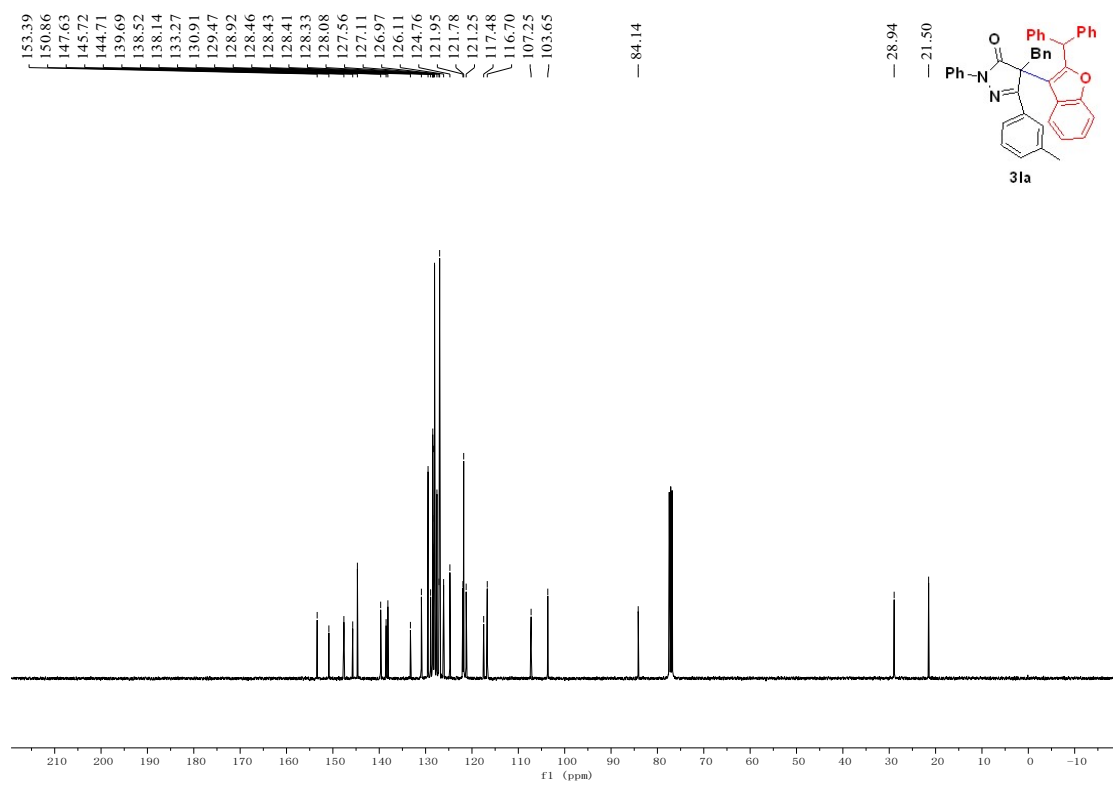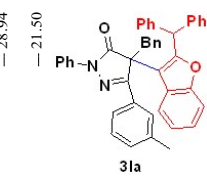

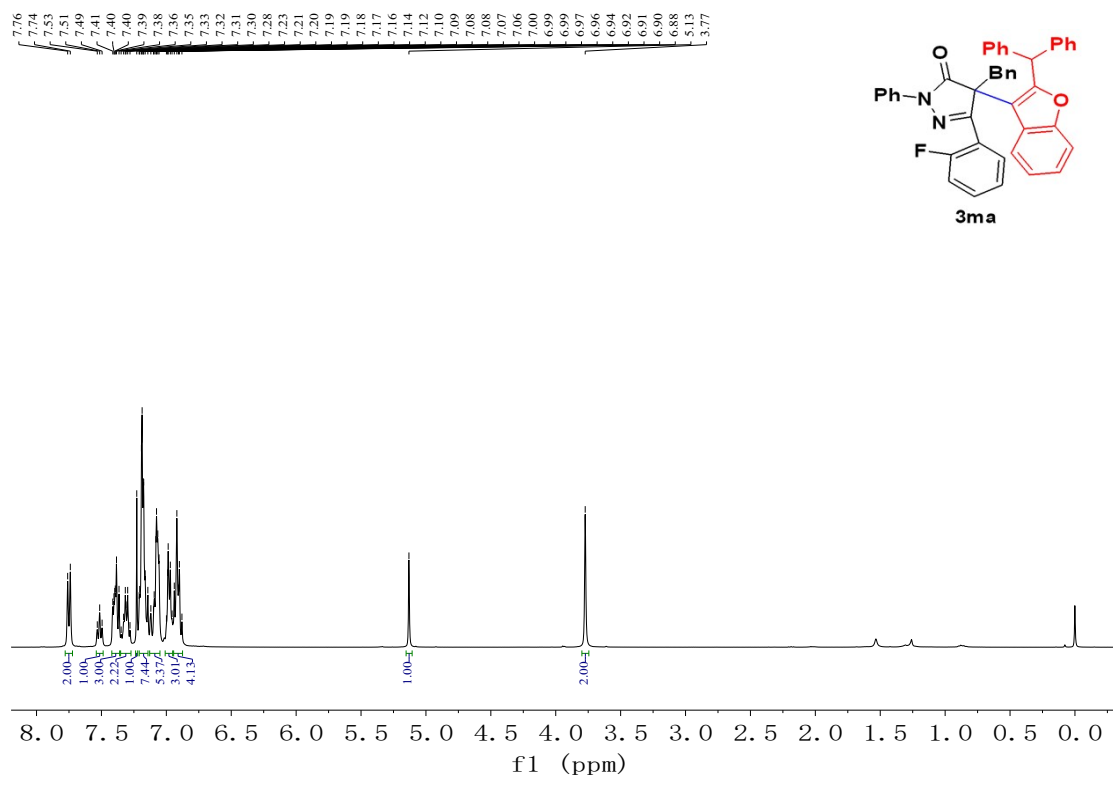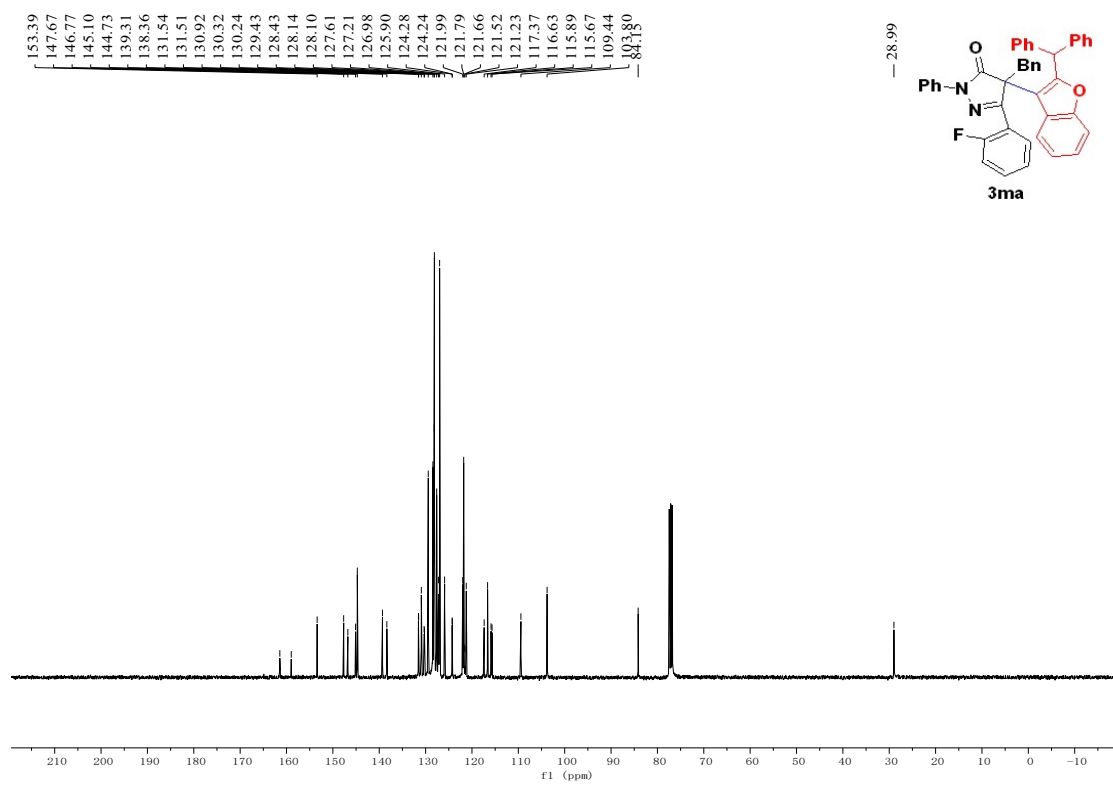

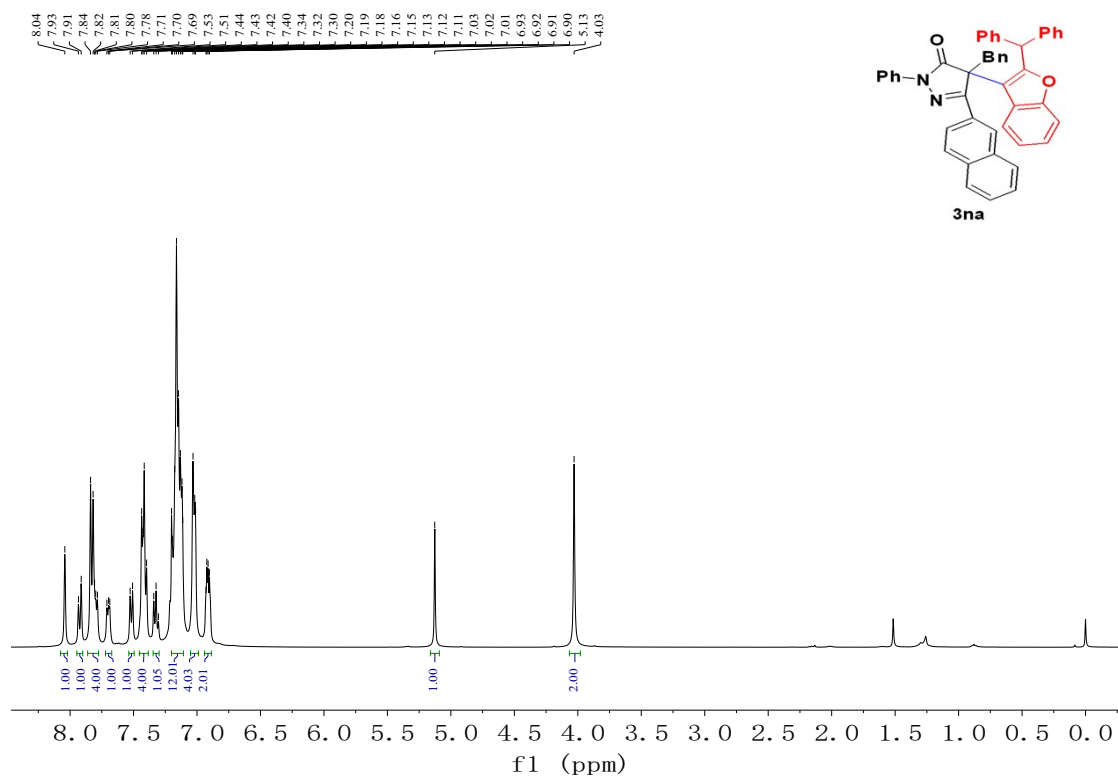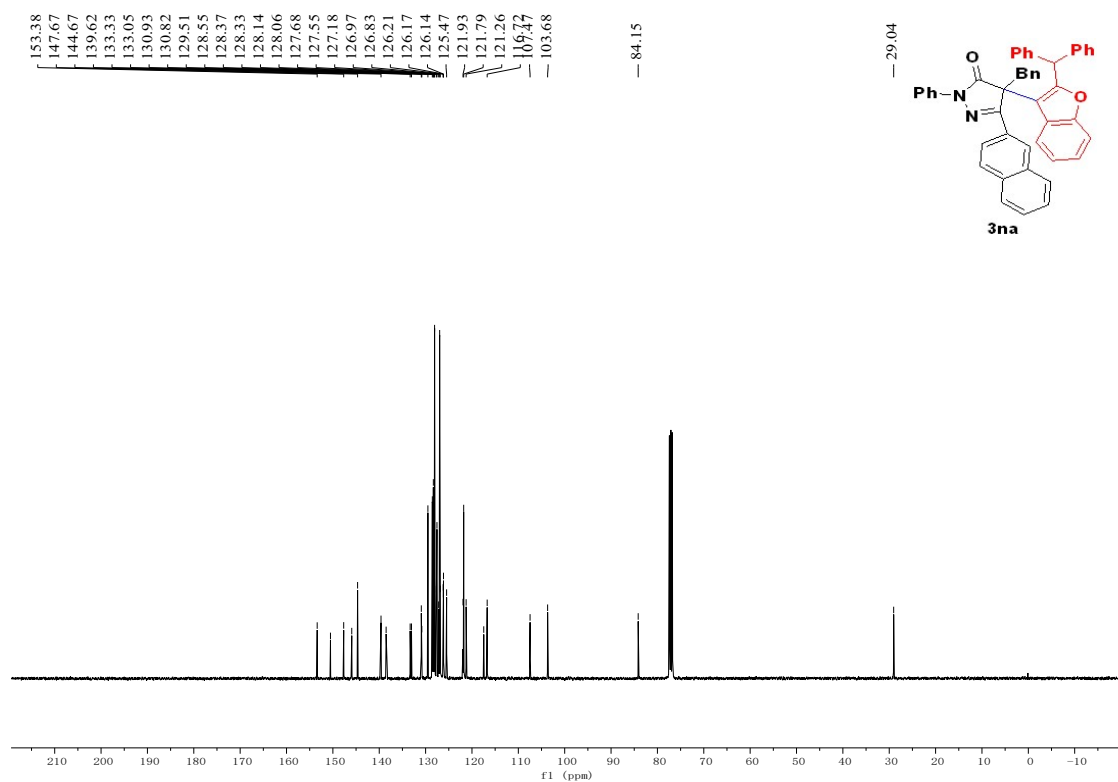

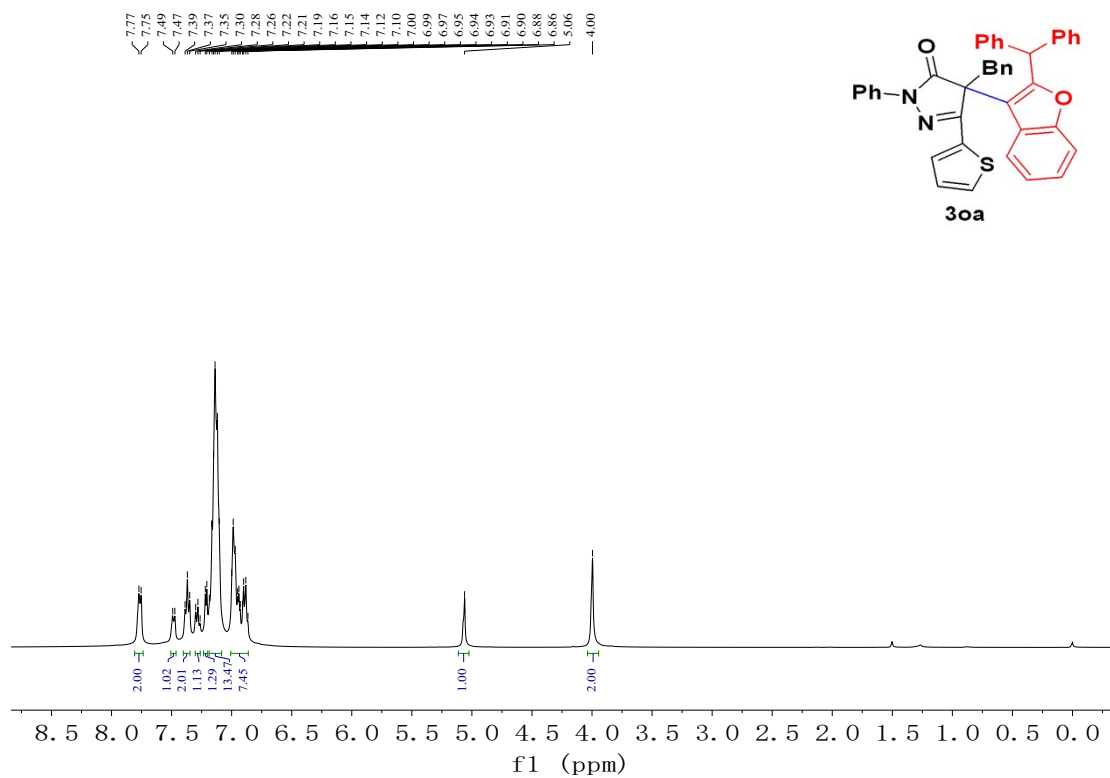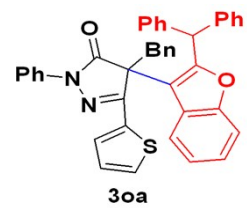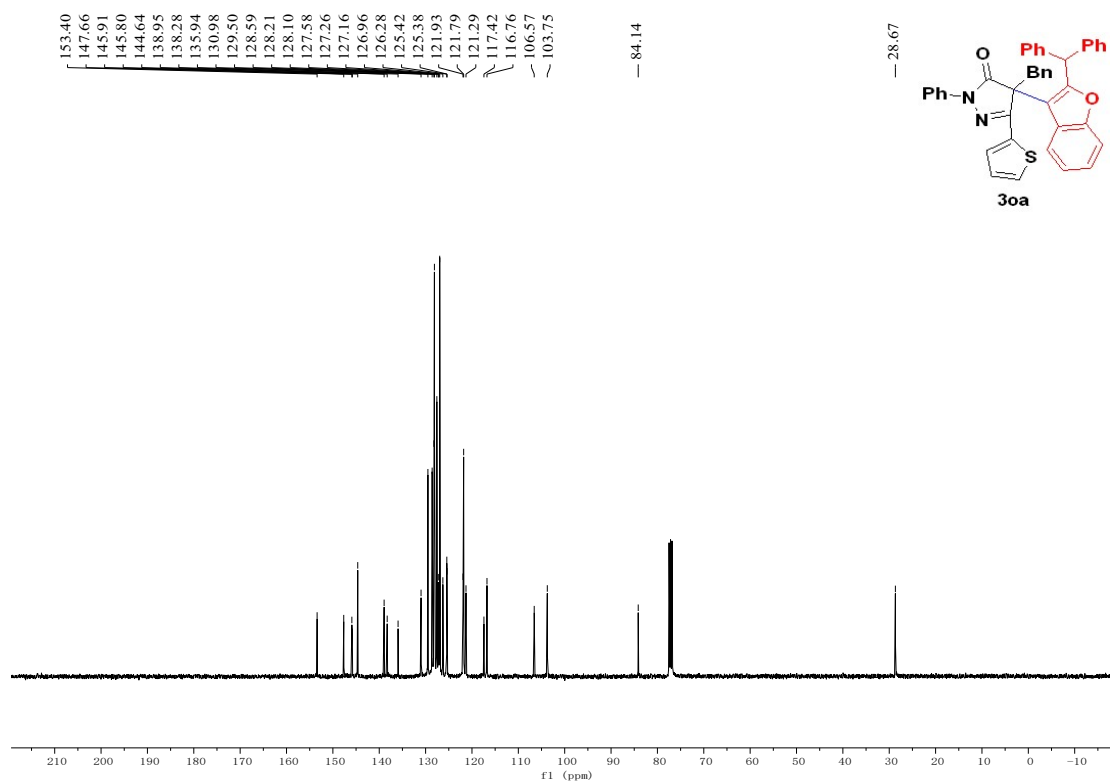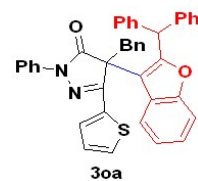

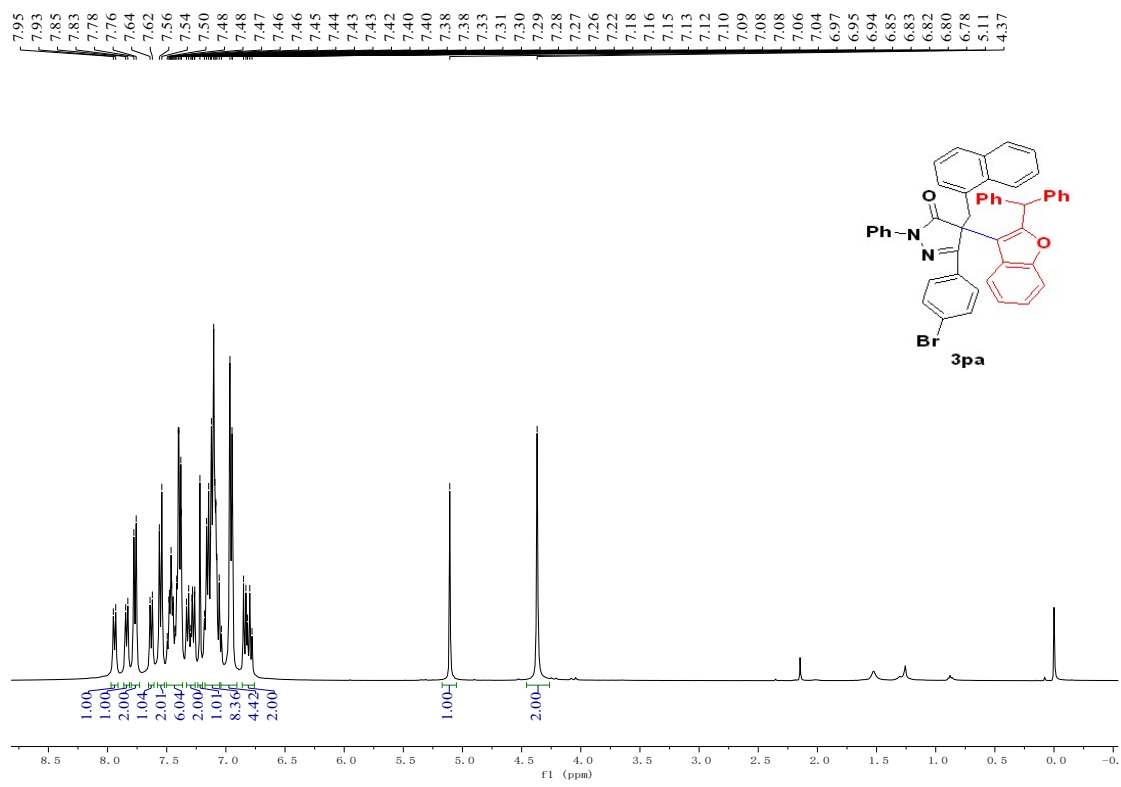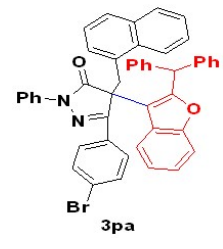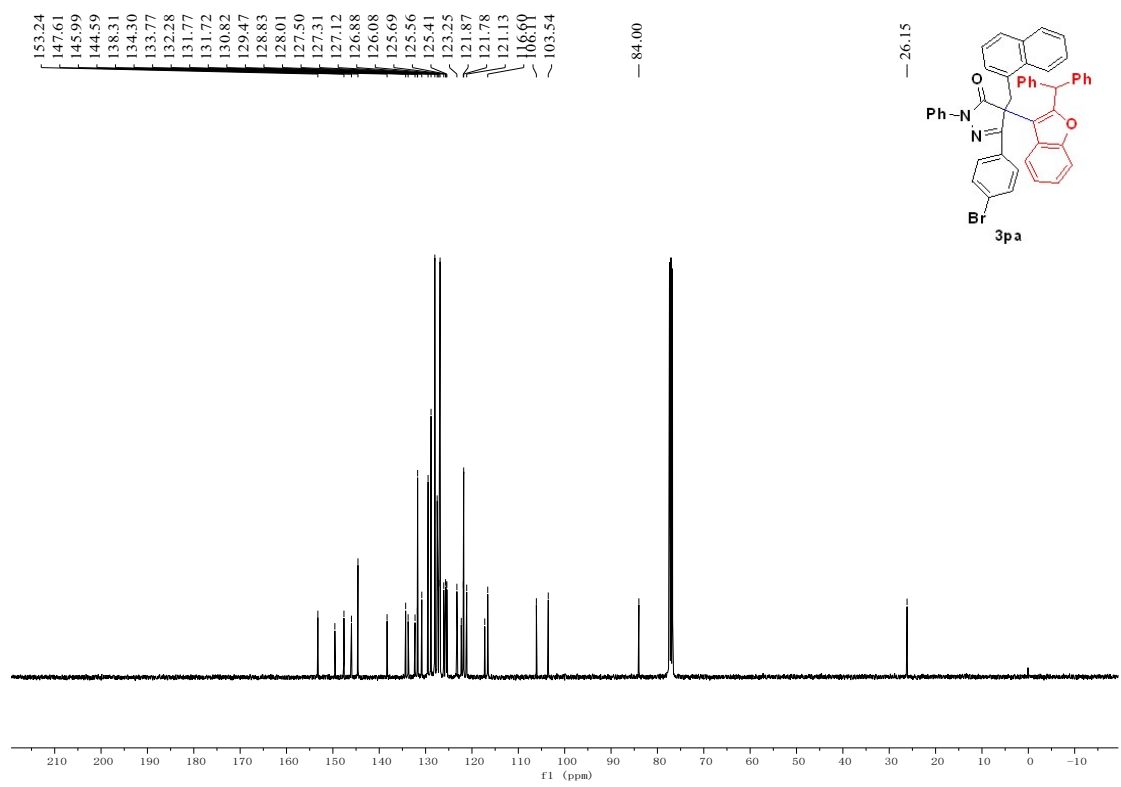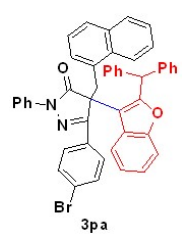

Supplement: d1ob01920a1.pdf [file d1ob01920a1.pdf]
